# Supplementary material
Source: PubMed Central journal article supplement (PMC5126981)
Supplement: NIHMS823909-supplement-Supplemental_Figures_1-4.pdf [file NIHMS823909-supplement-Supplemental_Figures_1-4.pdf]

# Leptin augments coronary vasoconstriction and smooth muscle proliferation via a Rho kinase dependent pathway

Basic Research in Cardiology

Jillian N. Noblet,<sup>1</sup> Adam G. Goodwill,<sup>1</sup> Daniel J. Sassoon,<sup>1</sup> Alexander M. Kiel,<sup>1,2</sup>  
Johnathan D. Tune<sup>1</sup>

<sup>1</sup>Department of Cellular & Integrative Physiology, Indiana University School of Medicine, Indianapolis, Indiana

<sup>2</sup>Weldon School of Biomedical Engineering, Purdue University, West Lafayette, Indiana

## **Correspondence:**

Johnathan D. Tune, PhD  
Department of Cellular & Integrative Physiology  
Indiana University School of Medicine  
635 Barnhill Drive  
Indianapolis, IN 46202  
Phone: 317-274-3433  
Email: [jtune@iu.edu](mailto:jtune@iu.edu)

**Fig. I**

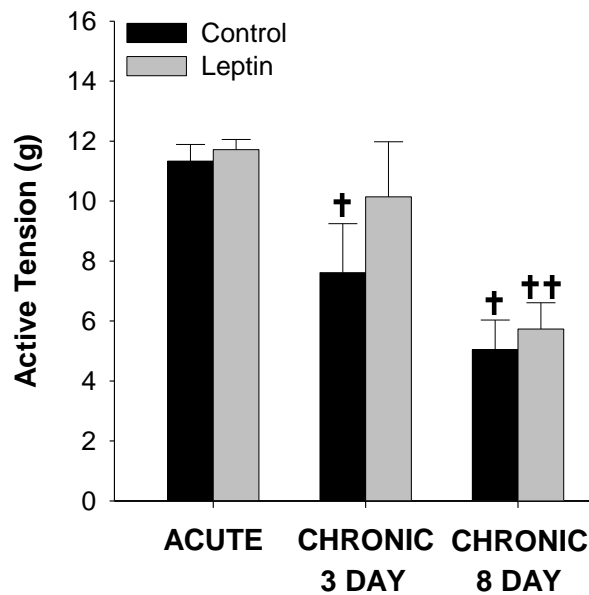

**Fig. I** Effects of acute versus chronic leptin treatment on coronary contraction. Leptin treatment had no effect on vasoconstriction to the thromboxane A<sub>2</sub> receptor agonist, U46619 (1 μM) following acute, chronic 3 day, or chronic 8 day exposure. Contractile responses in untreated, control arteries were progressively reduced throughout the culture time course. Contractile responses in leptin treated arteries were also reduced following 8 days of exposure. All groups n = 4. †*P*<0.05 versus acute control. ††*P*<0.05 versus acute leptin

Fig. II

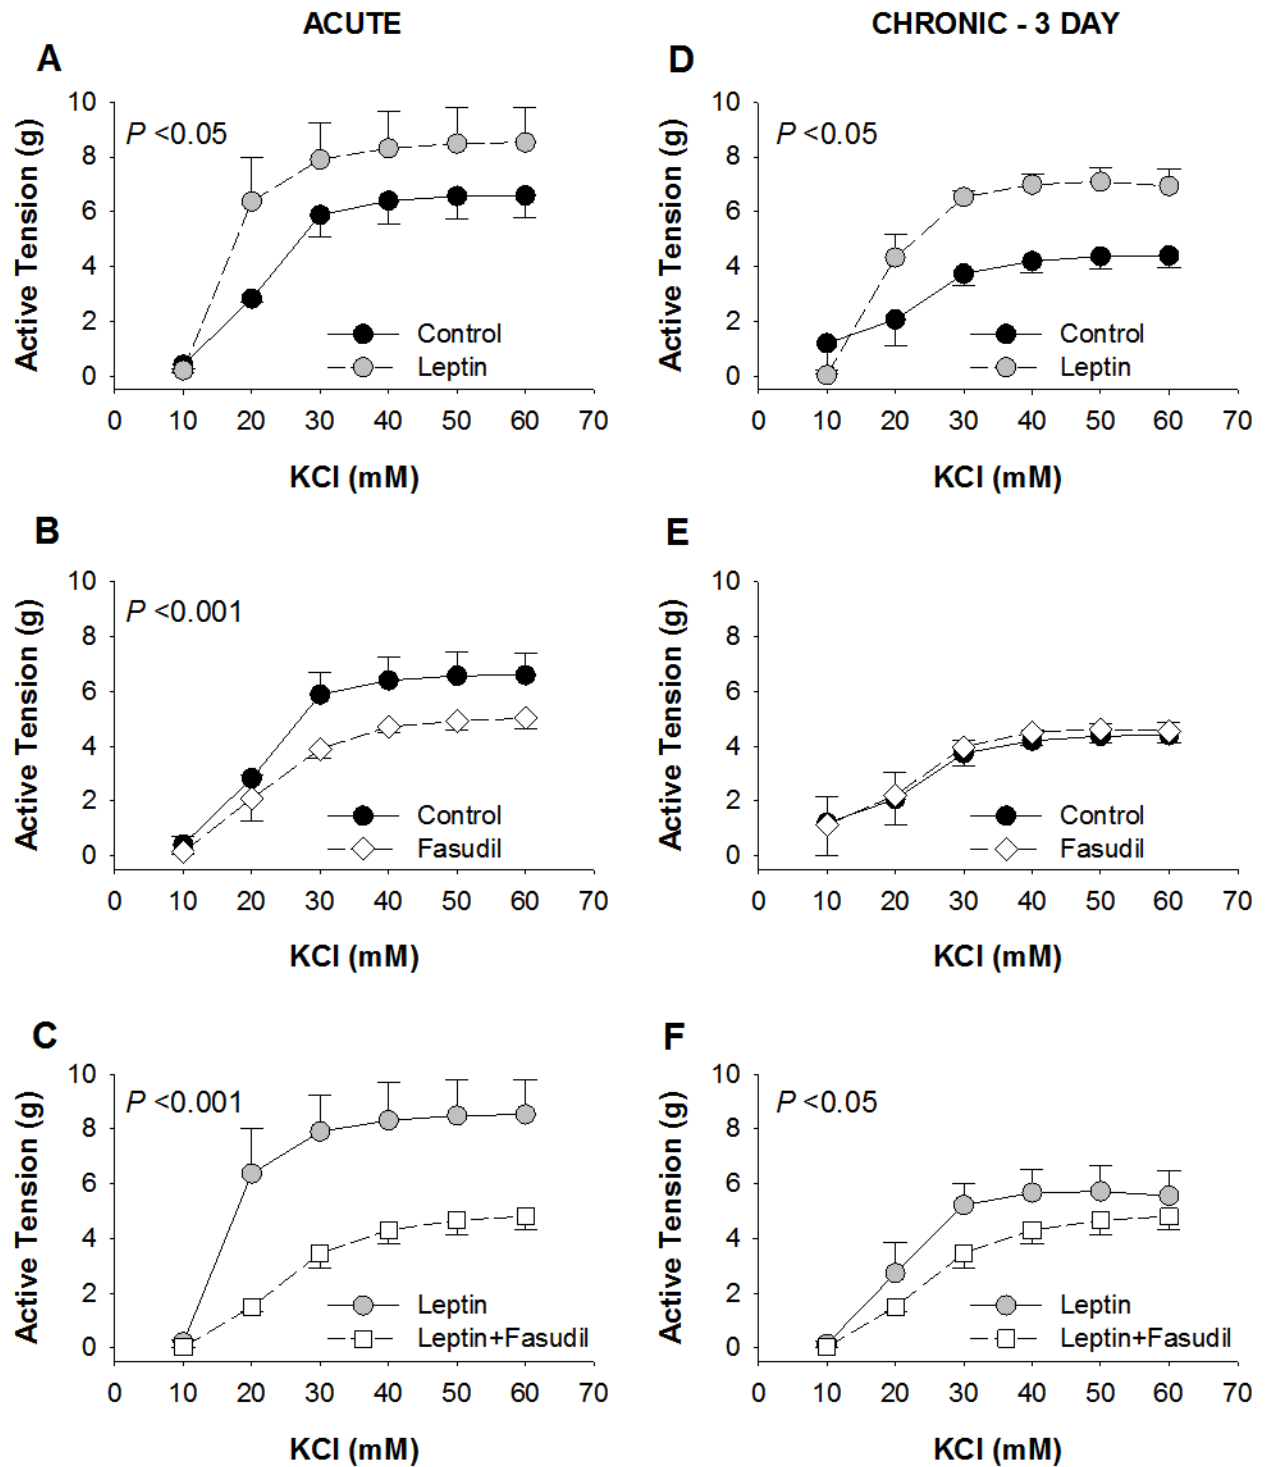

**Fig. II** Effects of leptin and/or fasudil treatment in the absence of coronary endothelium. Functional responses observed in endothelium intact arteries following acute (**Fig. 1A, 2A, 2C**) and chronic (**Fig. 1B, 2B, 2D**) leptin administration were similar to those observed in endothelium denuded arteries following acute (**A-C**) and chronic, 3 day (**D-F**) exposure. All groups  $n = 3$

**Fig. III**

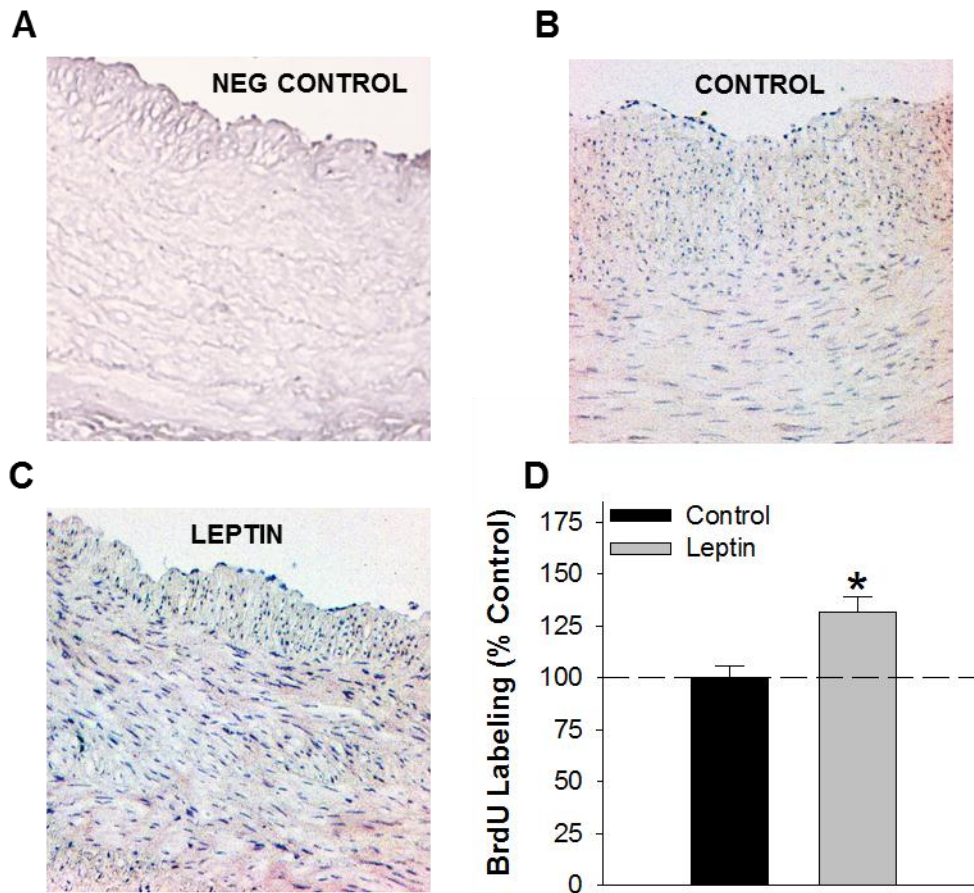

**Fig. III** Leptin augments cellular proliferation in coronary arteries. Representative images of BrdU-proliferation assays in negative control (no BrdU added to culture media [A]), untreated, control (B) and leptin treated (C) arteries (8 day culture in serum containing media). A significantly higher percentage of BrdU-positive nuclei was detected in leptin treated, relative to untreated arteries (D). Each group n = 5. \* $P < 0.05$ , leptin versus control

Fig. IV

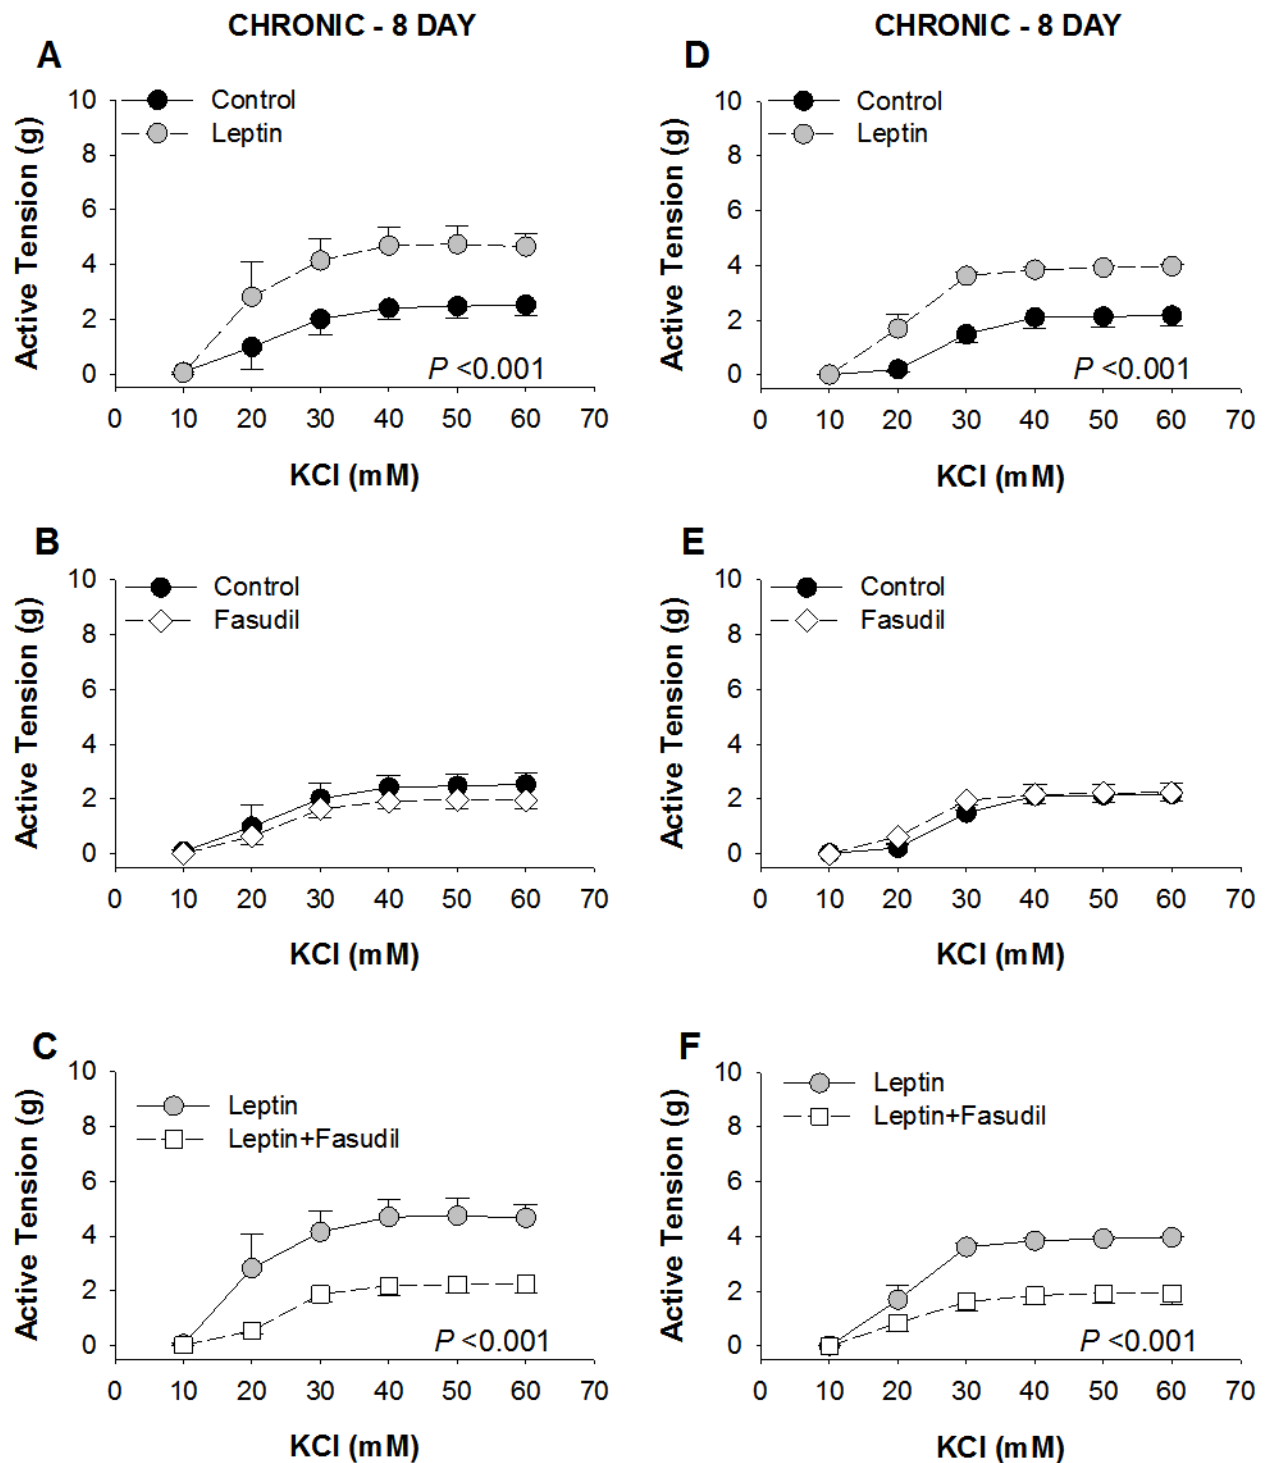

**Fig. IV** Effects of chronic, 8 day leptin and/or fasudil treatment on depolarization-induced contractions. Chronic leptin administration (8 day culture, serum-containing media) increased KCl-induced contractions ~2.2 g at doses >40 mM (A). Inhibition of Rho kinase with fasudil (1  $\mu$ M) had no effect on vasoconstriction to KCl in the absence of leptin (B), but reduced the effect of leptin administration on KCl-induced contractions (C). Functional responses of all treatment groups were similar in endothelium denuded arteries (D-F). All groups n = 3
