# Supplementary material
Source: PubMed Central journal article supplement (PMC5126981)
Supplement: NIHMS823909-supplement-Supplemental_Table_1.pdf [file NIHMS823909-supplement-Supplemental_Table_1.pdf]

# Leptin augments coronary vasoconstriction and smooth muscle proliferation via a Rho kinase dependent pathway

Basic Research in Cardiology

Jillian N. Noblet,<sup>1</sup> Adam G. Goodwill,<sup>1</sup> Daniel J. Sassoon,<sup>1</sup> Alexander M. Kiel,<sup>1,2</sup>  
Johnathan D. Tune<sup>1</sup>

<sup>1</sup>Department of Cellular & Integrative Physiology, Indiana University School of Medicine, Indianapolis, Indiana

<sup>2</sup>Weldon School of Biomedical Engineering, Purdue University, West Lafayette, Indiana

## **Correspondence:**

Johnathan D. Tune, PhD  
Department of Cellular & Integrative Physiology  
Indiana University School of Medicine  
635 Barnhill Drive  
Indianapolis, IN 46202  
Phone: 317-274-3433  
Email: [jtune@iu.edu](mailto:jtune@iu.edu)

**Table I. Complete list of protein changes detected in leptin-treated coronary arteries**

| Accession Number (gi) | Protein Name                                                                                | Control MEAN | Control SEM | Leptin MEAN | Leptin SEM | Ratio (Leptin/Control) | P value |
|-----------------------|---------------------------------------------------------------------------------------------|--------------|-------------|-------------|------------|------------------------|---------|
| 113205812             | calsarcin 1 [Sus scrofa]                                                                    | 0.258        | 0.258       | 1.490       | 0.281      | 5.784                  | 0.02224 |
| 115496760             | ras-related protein Rab-21 [Bos taurus]                                                     | 0.258        | 0.258       | 1.231       | 0.215      | 4.780                  | 0.00024 |
| 478507295             | PREDICTED: sorbin and SH3 domain-containing protein 1 isoform 1 [Ceratotherium simum simum] | 1.291        | 0.975       | 5.667       | 0.915      | 4.391                  | 0.00710 |
| 344285965             | PREDICTED: LIM and SH3 domain protein 1 isoform X1 [Loxodonta africana]                     | 1.004        | 0.421       | 3.247       | 0.778      | 3.234                  | 0.04793 |
| 149733215             | PREDICTED: eukaryotic translation initiation factor 6 isoform X1 [Equus caballus]           | 1.260        | 0.258       | 1.994       | 0.052      | 1.582                  | 0.04877 |
| 343488453             | adipose specific 2 [Sus scrofa]                                                             | 3.586        | 1.391       | 5.547       | 1.081      | 1.547                  | 0.01758 |
| 311275365             | PREDICTED: non-muscle caldesmon isoform X1 [Sus scrofa]                                     | 34.882       | 3.369       | 52.065      | 4.141      | 1.493                  | 0.00491 |
| 21956645              | myotrophin [Homo sapiens]                                                                   | 4.024        | 0.424       | 5.947       | 0.589      | 1.478                  | 0.02820 |
| 51592139              | protein S100-A11 [Sus scrofa]                                                               | 4.309        | 0.562       | 6.181       | 0.802      | 1.435                  | 0.03670 |
| 160333553             | 60S ribosomal protein L12 [Mus musculus]                                                    | 6.139        | 1.680       | 8.180       | 1.548      | 1.333                  | 0.01125 |
| 471405033             | PREDICTED: tropomyosin alpha-4 chain isoform 3 [Trichechus manatus latirostris]             | 83.834       | 6.385       | 109.518     | 7.208      | 1.306                  | 0.01805 |
| 471405030             | PREDICTED: tropomyosin alpha-4 chain isoform 2 [Trichechus manatus latirostris]             | 96.952       | 7.387       | 123.493     | 7.044      | 1.274                  | 0.02291 |
| 528768836             | hypothetical protein CB1_000172007 [Camelus ferus]                                          | 92.690       | 7.586       | 116.227     | 7.239      | 1.254                  | 0.02265 |
| 545503914             | PREDICTED: tubulin alpha chain-like [Canis lupus familiaris]                                | 17.534       | 0.968       | 20.608      | 1.172      | 1.175                  | 0.01756 |
| 73971272              | PREDICTED: tropomyosin beta chain isoform 1 [Canis lupus familiaris]                        | 185.488      | 11.935      | 215.973     | 5.359      | 1.164                  | 0.03469 |
| 338726213             | PREDICTED: tubulin alpha-1A chain-like [Equus caballus]                                     | 75.314       | 3.450       | 82.436      | 3.646      | 1.095                  | 0.00926 |
| 426222300             | PREDICTED: transitional endoplasmic reticulum ATPase [Ovis aries]                           | 10.398       | 1.452       | 11.243      | 1.614      | 1.081                  | 0.03649 |
|                       |                                                                                             |              |             |             |            |                        |         |
| 545871305             | PREDICTED: LOW QUALITY PROTEIN: myoferlin [Sus scrofa]                                      | 1.984        | 0.550       | 0.261       | 0.261      | -7.590                 | 0.02799 |
| 194207963             | PREDICTED: delta-1-pyrroline-5-carboxylate dehydrogenase, mitochondrial [Equus caballus]    | 1.476        | 0.448       | 0.243       | 0.243      | -6.080                 | 0.00918 |
| 148222591             | ATPase inhibitor, mitochondrial precursor [Sus scrofa]                                      | 1.267        | 0.272       | 0.259       | 0.259      | -4.894                 | 0.00003 |
| 115496434             | sorcin [Bos taurus]                                                                         | 1.260        | 0.258       | 0.261       | 0.261      | -4.821                 | 0.00003 |
| 311277187             | PREDICTED: translocon-associated protein subunit delta isoformX1 [Sus scrofa]               | 2.483        | 0.425       | 0.954       | 0.551      | -2.603                 | 0.04270 |
| 298160970             | cAMP-dependent protein kinase type II-alpha regulatory subunit [Sus scrofa]                 | 1.267        | 0.272       | 0.493       | 0.285      | -2.569                 | 0.04252 |
| 350586839             | PREDICTED: LOW QUALITY PROTEIN: chondroitin sulfate proteoglycan 4 [Sus scrofa]             | 4.764        | 0.933       | 1.976       | 0.384      | -2.411                 | 0.02713 |
| 12082136              | heat shock protein 90 alpha [Equus caballus]                                                | 16.304       | 0.884       | 6.962       | 2.030      | -2.342                 | 0.02046 |
| 256838109             | phosphate carrier protein, mitochondrial [Sus scrofa]                                       | 5.769        | 0.721       | 2.487       | 0.280      | -2.319                 | 0.01566 |
| 617574582             | PREDICTED: fibrillin-1 [Erinaceus europaeus]                                                | 31.725       | 6.279       | 14.566      | 8.410      | -2.178                 | 0.01951 |

|           |                                                                                                                        |        |       |        |        |        |         |
|-----------|------------------------------------------------------------------------------------------------------------------------|--------|-------|--------|--------|--------|---------|
| 392513702 | protein disulfide isomerase family A, member 4 precursor [Sus scrofa]                                                  | 5.769  | 0.721 | 2.706  | 0.399  | -2.132 | 0.03800 |
| 132574    | RecName: Full=Ribonuclease inhibitor; AltName: Full=Ribonuclease/angiogenin inhibitor 1 [Sus scrofa]                   | 5.783  | 0.492 | 2.724  | 0.433  | -2.123 | 0.00433 |
| 586989063 | PREDICTED: LOW QUALITY PROTEIN: fibrillin-1 [Felis catus]                                                              | 45.016 | 9.359 | 21.334 | 12.353 | -2.110 | 0.03330 |
| 47522608  | dolichyl-diphosphooligosaccharide--protein glycosyltransferase subunit 2 precursor [Sus scrofa]                        | 7.757  | 0.711 | 3.934  | 0.724  | -1.972 | 0.01836 |
| 239781822 | Chain A, Structure Of Glutamate Dehydrogenase Complexed With Bithionol                                                 | 4.519  | 0.253 | 2.471  | 0.227  | -1.828 | 0.00041 |
| 545877383 | PREDICTED: integrin alpha-1 [Sus scrofa]                                                                               | 11.781 | 0.983 | 6.486  | 0.868  | -1.816 | 0.04630 |
| 210060948 | Chain A, Crystal Structure Of Porcine Aldehyde Reductase Ternary Complex                                               | 6.535  | 0.654 | 3.676  | 0.745  | -1.778 | 0.00017 |
| 281350257 | hypothetical protein PANDA_012129 [Ailuropoda melanoleuca]                                                             | 1.755  | 0.245 | 0.997  | 0.026  | -1.760 | 0.04256 |
| 335287187 | PREDICTED: ATP synthase subunit b, mitochondrial [Sus scrofa]                                                          | 3.020  | 0.069 | 1.736  | 0.238  | -1.740 | 0.01894 |
| 149756873 | PREDICTED: calreticulin [Equus caballus]                                                                               | 9.489  | 1.636 | 5.628  | 1.584  | -1.686 | 0.01366 |
| 545881093 | PREDICTED: prostacyclin synthase isoform X1 [Sus scrofa]                                                               | 12.396 | 1.539 | 7.377  | 1.684  | -1.680 | 0.02832 |
| 311253435 | PREDICTED: collagen alpha-1(XIV) chain isoform X1 [Sus scrofa]                                                         | 78.779 | 3.063 | 47.471 | 4.658  | -1.660 | 0.01278 |
| 545884624 | PREDICTED: LOW QUALITY PROTEIN: ubiquitin-like modifier activating enzyme 1 [Sus scrofa]                               | 12.607 | 1.346 | 7.704  | 1.591  | -1.637 | 0.03853 |
| 281348600 | hypothetical protein PANDA_019876 [Ailuropoda melanoleuca]                                                             | 2.766  | 0.254 | 1.724  | 0.440  | -1.604 | 0.04743 |
| 548527697 | PREDICTED: LOW QUALITY PROTEIN: neuroblast differentiation-associated protein AHNAK [Capra hircus]                     | 26.261 | 2.876 | 17.150 | 2.095  | -1.531 | 0.00744 |
| 154147607 | calpain-2 catalytic subunit [Sus scrofa]                                                                               | 12.114 | 1.105 | 7.959  | 0.335  | -1.522 | 0.03649 |
| 1170740   | RecName: Full=L-lactate dehydrogenase A chain; Short=LDH-A; AltName: Full=LDH muscle subunit; Short=LDH-M [Sus scrofa] | 16.064 | 1.286 | 10.635 | 1.669  | -1.510 | 0.02359 |
| 301786567 | PREDICTED: transmembrane protein 109-like [Ailuropoda melanoleuca]                                                     | 7.509  | 0.498 | 5.013  | 0.520  | -1.498 | 0.02765 |
| 114052480 | dermatopontin precursor [Bos taurus]                                                                                   | 7.035  | 0.922 | 4.725  | 0.207  | -1.489 | 0.04980 |
| 126722693 | alpha-crystallin B chain [Oryctolagus cuniculus]                                                                       | 27.360 | 1.370 | 18.690 | 1.113  | -1.464 | 0.01028 |
| 304365428 | protein disulfide-isomerase A3 precursor [Sus scrofa]                                                                  | 20.767 | 1.652 | 14.538 | 2.162  | -1.429 | 0.04491 |
| 343183420 | lumican precursor [Sus scrofa]                                                                                         | 34.624 | 4.503 | 24.337 | 3.975  | -1.423 | 0.00826 |
| 426251878 | PREDICTED: LOW QUALITY PROTEIN: neuroblast differentiation-associated protein AHNAK [Ovis aries]                       | 27.025 | 3.273 | 19.104 | 1.750  | -1.415 | 0.01529 |
| 431892845 | Moesin [Pteropus alecto]                                                                                               | 34.832 | 2.058 | 25.027 | 1.669  | -1.392 | 0.03728 |
| 329744642 | glyceraldehyde-3-phosphate dehydrogenase [Sus scrofa]                                                                  | 38.195 | 3.502 | 27.918 | 2.370  | -1.368 | 0.00487 |
| 528757271 | hypothetical protein CB1_001341009 [Camelus ferus]                                                                     | 18.356 | 0.507 | 13.443 | 1.192  | -1.366 | 0.01312 |
| 47169448  | Chain A, Structure Of Pig Muscle Pkg Complexed With Mgatp                                                              | 32.384 | 1.055 | 24.059 | 1.313  | -1.346 | 0.00197 |

|           |                                                                                                          |          |             |           |             |             |             |
|-----------|----------------------------------------------------------------------------------------------------------|----------|-------------|-----------|-------------|-------------|-------------|
| 335282386 | PREDICTED: elongation factor 2 [Sus scrofa]                                                              | 26.117   | 1.288       | 19.803    | 2.247       | -1.319      | 0.03958     |
| 470629372 | PREDICTED: LOW QUALITY PROTEIN: neuroblast differentiation-associated protein AHNAK [Tursiops truncatus] | 24.972   | 2.460       | 19.120    | 2.026       | -1.306      | 0.00849     |
| 301761876 | PREDICTED: 78 kDa glucose-regulated protein-like [Ailuropoda melanoleuca]                                | 28.360   | 1.661       | 22.023    | 1.574       | -1.288      | 0.01731     |
| 149725667 | PREDICTED: T-complex protein 1 subunit zeta isoformX1 [Equus caballus]                                   | 7.347    | 0.884       | 5.732     | 0.620       | -1.282      | 0.01049     |
| 545806957 | PREDICTED: LOW QUALITY PROTEIN: AHNAK nucleoprotein [Sus scrofa]                                         | 33.820   | 3.865       | 26.585    | 2.561       | -1.272      | 0.02246     |
| 545819748 | PREDICTED: elongation factor 1-delta isoform X4 [Sus scrofa]                                             | 4.047    | 0.633       | 3.269     | 0.545       | -1.238      | 0.01977     |
| 13399613  | Chain A, X-Ray Structure Of Full-Length Annexin 1                                                        | 57.789   | 3.069       | 46.700    | 2.254       | -1.237      | 0.00267     |
| 54020966  | annexin A2 [Sus scrofa]                                                                                  | 81.978   | 4.401       | 68.049    | 4.666       | -1.205      | 0.02374     |
| 511902194 | PREDICTED: WD repeat-containing protein 1 isoform X2 [Mustela putorius furo]                             | 24.342   | 1.691       | 20.421    | 2.096       | -1.192      | 0.00872     |
| 347300323 | thioredoxin-dependent peroxide reductase, mitochondrial [Sus scrofa]                                     | 7.023    | 0.292       | 5.983     | 0.156       | -1.174      | 0.02274     |
| 545870537 | PREDICTED: vinculin isoform X1 [Sus scrofa]                                                              | 119.348  | 4.302       | 106.039   | 5.949       | -1.126      | 0.02628     |
| 335289881 | PREDICTED: EH domain-containing protein 2 [Sus scrofa]                                                   | 26.506   | 2.799       | 23.891    | 2.757       | -1.109      | 0.00404     |
| 357575888 | heat shock protein 70kDa protein 8 [Capra hircus]                                                        | 18.079   | 0.613       | 17.123    | 0.848       | -1.056      | 0.03843     |
| 346644882 | reticulocalbin 2, EF-hand calcium binding domain precursor [Sus scrofa]                                  | 1.476    | 0.448       | 0.000     | 0.000       | 0.000       | 0.04580     |
| 335299041 | PREDICTED: cytochrome b-c1 complex subunit 1, mitochondrial isoform X1 [Sus scrofa]                      | 1.476    | 0.448       | 0.000     | 0.000       | 0.000       | 0.04580     |
|           |                                                                                                          |          |             |           |             |             |             |
| 488618959 | MULTISPECIES: nitrogen regulatory protein P-II 1 [Pseudomonas]                                           | 0.23493  | 0.23493     | 1.9427    | 1.9427      | 8.269271698 | 0.391002219 |
| 634880411 | PREDICTED: synaptopodin-2 isoform X1 [Oryzteropus afer afer]                                             | 0.488805 | 0.282635309 | 4.01695   | 1.272730077 | 8.217898753 | 0.082955279 |
| 602719972 | PREDICTED: synemin isoform X1 [Lipotes vexillifer]                                                       | 0.260075 | 0.260075    | 1.231365  | 0.214574573 | 4.734653465 | 0.085621219 |
| 545855913 | PREDICTED: collagen alpha-2(IV) chain [Sus scrofa]                                                       | 1.007805 | 0.729026877 | 4.7238    | 1.128609755 | 4.687216277 | 0.055005478 |
| 620976181 | PREDICTED: filamin-A isoform X1 [Ornithorhynchus anatinus]                                               | 78.0625  | 78.0625     | 322.545   | 1.938136992 | 4.131881505 | 0.050705015 |
| 28189705  | similar to cytoplasmic dynein light chain 1 [Bos taurus]                                                 | 0.260075 | 0.260075    | 1.04305   | 0.739402621 | 4.010573873 | 0.391899516 |
| 281341251 | hypothetical protein PANDA_002907 [Ailuropoda melanoleuca]                                               | 0.488805 | 0.282635309 | 1.490165  | 0.281379967 | 3.048587883 | 0.172658966 |
| 297481810 | PREDICTED: LOW QUALITY PROTEIN: laminin subunit alpha-5 [Bos taurus]                                     | 0.77405  | 0.496985842 | 2.34755   | 1.727765035 | 3.032814418 | 0.391903963 |
| 545824615 | PREDICTED: SUN domain-containing protein 2 isoform X1 [Sus scrofa]                                       | 0.253875 | 0.253875    | 0.744475  | 0.468041151 | 2.93244707  | 0.499101166 |
| 47522718  | dolichyl-diphosphooligosaccharide--protein glycosyltransferase subunit DAD1 [Sus scrofa]                 | 0.5177   | 0.298900928 | 1.5040775 | 0.673491777 | 2.905307128 | 0.375166859 |
| 478512633 | PREDICTED: laminin subunit alpha-5 [Ceratotherium simum simum]                                           | 1.507725 | 0.660919619 | 4.323375  | 1.424801544 | 2.867482465 | 0.225458215 |
| 350595384 | PREDICTED: glycine--tRNA ligase isoform X1 [Sus scrofa]                                                  | 0.260075 | 0.260075    | 0.7271    | 0.4533045   | 2.795732    | 0.392505995 |

|           |                                                                                                                                                                                                   |          |             |           |             |             |             |
|-----------|---------------------------------------------------------------------------------------------------------------------------------------------------------------------------------------------------|----------|-------------|-----------|-------------|-------------|-------------|
| 395504892 | PREDICTED: 40S ribosomal protein S14-like [Sarcophilus harrisi]                                                                                                                                   | 1.006505 | 0.022838214 | 2.734865  | 1.038651828 | 2.717189681 | 0.189377295 |
| 296475388 | TPA: cellular retinoic acid-binding protein 1 [Bos taurus]                                                                                                                                        | 1.02545  | 0.414620763 | 2.705575  | 0.398691356 | 2.638427032 | 0.091648916 |
| 157832116 | Chain A, Structural Basis Of The 70-Kilodalton Heat Shock Cognate Protein Atp Hydrolytic Activity, Ii. Structure Of The Active Site With Adp Or Atp Bound To Wild Type And Mutant Atpase Fragment | 6.343    | 6.343       | 16.4375   | 5.524842705 | 2.591439382 | 0.263224284 |
| 149642096 | PREDICTED: cellular nucleic acid-binding protein isoform X2 [Ornithorhynchus anatinus]                                                                                                            | 0.492555 | 0.284979855 | 1.231365  | 0.214574573 | 2.49995432  | 0.05436688  |
| 154426164 | Ribosomal protein L3 [Bos taurus]                                                                                                                                                                 | 0.51395  | 0.29677235  | 1.2746025 | 0.503264533 | 2.480012647 | 0.058569339 |
| 149720998 | PREDICTED: small nuclear ribonucleoprotein Sm D1 [Equus caballus]                                                                                                                                 | 0.5115   | 0.295330535 | 1.24875   | 0.606877259 | 2.441348974 | 0.444372388 |
| 530667993 | unconventional myosin-Ic isoform b [Camelus ferus]                                                                                                                                                | 6.751625 | 4.408863673 | 16.311525 | 2.625003491 | 2.415940607 | 0.248428968 |
| 149635990 | PREDICTED: 40S ribosomal protein S21 [Ornithorhynchus anatinus]                                                                                                                                   | 0.77405  | 0.496985842 | 1.7602775 | 0.276514646 | 2.274113429 | 0.090337268 |
| 114052148 | tubulin beta-6 chain [Bos taurus]                                                                                                                                                                 | 7.2135   | 7.2135      | 15.48925  | 8.949716507 | 2.147258612 | 0.340052857 |
| 262073079 | collagen alpha-1(IV) chain precursor [Bos taurus]                                                                                                                                                 | 1.52423  | 0.315995655 | 3.269     | 0.545039697 | 2.14468945  | 0.050983207 |
| 194211182 | PREDICTED: nexilin isoformX1 [Equus caballus]                                                                                                                                                     | 1.0292   | 0.420730989 | 2.2013    | 0.563231313 | 2.138845705 | 0.070796767 |
| 281341175 | hypothetical protein PANDA_015940 [Ailuropoda melanoleuca]                                                                                                                                        | 1.1936   | 0.887967981 | 2.5213    | 1.457648164 | 2.112349196 | 0.27468909  |
| 343780946 | D-dopachrome decarboxylase [Sus scrofa]                                                                                                                                                           | 0.5115   | 0.295330535 | 1.037825  | 0.732001647 | 2.028983382 | 0.597589397 |
| 281346938 | hypothetical protein PANDA_001588 [Ailuropoda melanoleuca]                                                                                                                                        | 0.74643  | 0.249601883 | 1.49279   | 0.286403496 | 1.99990622  | 0.054829328 |
| 118403848 | ubiquitin-conjugating enzyme E2 D2 [Sus scrofa]                                                                                                                                                   | 1.25793  | 0.493812054 | 2.508565  | 0.673823561 | 1.99420079  | 0.094704976 |
| 139948705 | leiomodrin-1 [Bos taurus]                                                                                                                                                                         | 3.077675 | 1.250675031 | 6.11965   | 1.316191158 | 1.988400335 | 0.195584174 |
| 156523084 | matrin-3 [Bos taurus]                                                                                                                                                                             | 0.77405  | 0.496985842 | 1.5334025 | 0.676427546 | 1.981012209 | 0.058559222 |
| 440904073 | Copper transport protein ATOX1, partial [Bos mutus]                                                                                                                                               | 0.771575 | 0.257242212 | 1.5174425 | 0.325417898 | 1.966681787 | 0.076545378 |
| 296477149 | TPA: elongin B-like [Bos taurus]                                                                                                                                                                  | 0.51395  | 0.29677235  | 0.988525  | 0.383544768 | 1.923387489 | 0.3837056   |
| 148230268 | galectin-3 [Sus scrofa]                                                                                                                                                                           | 1.02545  | 0.414620763 | 1.969775  | 0.364531449 | 1.92088839  | 0.173083485 |
| 153791684 | calcium/calmodulin-dependent protein kinase type II subunit gamma [Oryctolagus cuniculus]                                                                                                         | 1.521755 | 0.523685429 | 2.74355   | 0.887189261 | 1.802885484 | 0.312661824 |
| 586534588 | PREDICTED: laminin subunit alpha-5 [Pteropus alecto]                                                                                                                                              | 1.965175 | 0.6423131   | 3.54175   | 0.950173974 | 1.802256796 | 0.237217836 |
| 545873981 | PREDICTED: sorbin and SH3 domain-containing protein 2 isoform X5 [Sus scrofa]                                                                                                                     | 14.2028  | 2.675584398 | 25.43625  | 5.634251405 | 1.79093207  | 0.065176462 |
| 505842687 | PREDICTED: polypyrimidine tract-binding protein 1 isoform X1 [Sorex araneus]                                                                                                                      | 1.546925 | 0.667458936 | 2.746175  | 0.501940352 | 1.775247669 | 0.113055905 |
| 313507265 | Chain A, Refined Structure Of Porcine Cytosolic Adenylate Kinase At 2.1 Angstroms Resolution                                                                                                      | 1.52423  | 0.315995655 | 2.69425   | 0.785646225 | 1.767613812 | 0.117340448 |
| 311268187 | PREDICTED: thioredoxin domain-containing protein 17 isoform 1 [Sus scrofa]                                                                                                                        | 2.008125 | 0.842543258 | 3.505775  | 0.684877165 | 1.745795207 | 0.21637304  |
| 444706336 | Leiomodrin-1 [Tupaia chinensis]                                                                                                                                                                   | 2.262    | 0.882158292 | 3.9369    | 0.589139998 | 1.740450928 | 0.07525657  |
| 301753613 | PREDICTED: transcriptional activator protein Pur-alpha-like, partial [Ailuropoda melanoleuca]                                                                                                     | 1.2818   | 0.765856263 | 2.228575  | 0.196507703 | 1.738629271 | 0.354120077 |
| 545840976 | PREDICTED: poly [ADP-ribose] polymerase 6 isoform X2 [Sus scrofa]                                                                                                                                 | 39.84425 | 23.22938314 | 69.26025  | 4.596551994 | 1.738274657 | 0.240371352 |

|           |                                                                                           |           |             |           |             |             |             |
|-----------|-------------------------------------------------------------------------------------------|-----------|-------------|-----------|-------------|-------------|-------------|
| 667266325 | PREDICTED: keratin, type I cytoskeletal 14 isoform X1 [Galeopterus variegatus]            | 4.5088    | 1.899073927 | 7.75565   | 2.686317118 | 1.720113999 | 0.357797129 |
| 126322035 | PREDICTED: translocon-associated protein subunit alpha isoform X1 [Monodelphis domestica] | 1.2893    | 0.496579616 | 2.192615  | 0.867171251 | 1.70062437  | 0.238883247 |
| 148792972 | heart fatty acid-binding protein [Sus scrofa]                                             | 2.54968   | 0.536871863 | 4.290875  | 0.849298426 | 1.682907267 | 0.09331917  |
| 335306675 | PREDICTED: B-cell receptor-associated protein 31 isoform X1 [Sus scrofa]                  | 1.49905   | 0.274579389 | 2.498675  | 0.310198215 | 1.666838998 | 0.124311312 |
| 667266322 | PREDICTED: keratin, type I cytoskeletal 19-like [Galeopterus variegatus]                  | 3.038475  | 0.447276975 | 5.039175  | 1.165114839 | 1.658455311 | 0.07505649  |
| 194207535 | PREDICTED: 40S ribosomal protein S8 [Equus caballus]                                      | 0.765375  | 0.486800411 | 1.2647    | 0.479258418 | 1.652392618 | 0.606466474 |
| 350587194 | PREDICTED: tryptophan--tRNA ligase, cytoplasmic isoformX1 [Sus scrofa]                    | 0.755105  | 0.494271511 | 1.231365  | 0.214574573 | 1.630720231 | 0.505692042 |
| 149715179 | PREDICTED: dynactin subunit 2 isoformX2 [Equus caballus]                                  | 1.543175  | 0.51449313  | 2.5073525 | 0.642497106 | 1.624801141 | 0.435830313 |
| 118403762 | extracellular superoxide dismutase precursor [Sus scrofa]                                 | 0.765375  | 0.486800411 | 1.231365  | 0.214574573 | 1.608838805 | 0.407883873 |
| 297591965 | leukotriene A-4 hydrolase [Sus scrofa]                                                    | 1.991625  | 0.559199179 | 3.179925  | 0.780884647 | 1.596648465 | 0.072458048 |
| 281342866 | hypothetical protein PANDA_018340 [Ailuropoda melanoleuca]                                | 1.546925  | 0.667458936 | 2.426765  | 1.093417258 | 1.56876707  | 0.235371407 |
| 117938498 | fatty acid binding protein 4 [Sus scrofa]                                                 | 3.610275  | 1.374065461 | 5.569275  | 2.012289828 | 1.542617945 | 0.27818017  |
| 545856478 | PREDICTED: septin-9-like isoform X1 [Sus scrofa]                                          | 1.776955  | 1.148670405 | 2.74009   | 0.607741772 | 1.542014288 | 0.413519855 |
| 350579892 | PREDICTED: coronin-1B [Sus scrofa]                                                        | 0.9851    | 0.569954481 | 1.5174425 | 0.325417898 | 1.540394376 | 0.593919161 |
| 13385872  | interleukin enhancer-binding factor 2 [Mus musculus]                                      | 1.266605  | 0.272091248 | 1.9425    | 0.637802136 | 1.533627295 | 0.459408797 |
| 347300340 | thrombospondin 1 precursor [Sus scrofa]                                                   | 6.63105   | 1.665915133 | 10.111    | 1.144890851 | 1.524796224 | 0.12336597  |
| 14043072  | heterogeneous nuclear ribonucleoproteins A2/B1 isoform B1 [Homo sapiens]                  | 4.847925  | 1.113695348 | 7.37835   | 1.106500442 | 1.521960426 | 0.24418042  |
| 350584744 | PREDICTED: cysteine and glycine-rich protein 2 isoform X1 [Sus scrofa]                    | 7.57495   | 1.409203281 | 11.51795  | 1.434208517 | 1.520531489 | 0.110276528 |
| 472359333 | PREDICTED: laminin subunit beta-2-like [Odobenus rosmarus divergens]                      | 7.206     | 1.839846774 | 10.825975 | 2.669073601 | 1.502355676 | 0.437927026 |
| 170763498 | protein SET isoform 2 [Homo sapiens]                                                      | 0.520175  | 0.520175    | 0.779025  | 0.49602796  | 1.497620993 | 0.396468174 |
| 560938097 | PREDICTED: protein DJ-1 [Camelus ferus]                                                   | 0.939725  | 0.939725    | 1.4049    | 1.4049      | 1.495011839 | 0.825346305 |
| 14277700  | 40S ribosomal protein S12 [Homo sapiens]                                                  | 1.53043   | 0.677161461 | 2.2804775 | 0.527140986 | 1.490089387 | 0.468677593 |
| 48374073  | chitinase-3-like protein 1 precursor [Sus scrofa]                                         | 1.002755  | 0.415149412 | 1.4841    | 0.61443455  | 1.480022538 | 0.593770093 |
| 126722987 | glycogenin-1 [Orctolagus cuniculus]                                                       | 1.037875  | 0.735630862 | 1.5334025 | 0.676427546 | 1.477444297 | 0.420607147 |
| 126308801 | PREDICTED: 60S ribosomal protein L38 isoform X1 [Monodelphis domestica]                   | 2.053375  | 0.932604761 | 3.026165  | 0.755481182 | 1.47375175  | 0.064054278 |
| 126022833 | cystatin B protein [Sus scrofa]                                                           | 2.553455  | 0.686771089 | 3.76195   | 0.67617061  | 1.473278362 | 0.13238317  |
| 511922328 | PREDICTED: collagen alpha-1(VI) chain isoform X2 [Mustela putorius furo]                  | 10.528875 | 2.510794796 | 15.4846   | 3.977013079 | 1.470679441 | 0.194501553 |
| 119936498 | proteasome 26S non-ATPase subunit 11 [Bos taurus]                                         | 0.495005  | 0.286527772 | 0.7271    | 0.4533045   | 1.468874052 | 0.720305909 |
| 301779149 | PREDICTED: keratin, type I cytoskeletal 10-like [Ailuropoda melanoleuca]                  | 19.756    | 4.691383946 | 28.9255   | 1.708215272 | 1.464137477 | 0.175508717 |
| 478537935 | PREDICTED: plectin isoform 1 [Ceratotherium simum simum]                                  | 2.846175  | 1.655408299 | 4.1299    | 1.782206708 | 1.451035161 | 0.190155206 |
| 545869589 | PREDICTED: smoothelin isoform X1 [Sus scrofa]                                             | 11.674325 | 2.585582511 | 16.8645   | 3.274509289 | 1.444580308 | 0.431351248 |

|           |                                                                                                       |           |             |           |             |             |             |
|-----------|-------------------------------------------------------------------------------------------------------|-----------|-------------|-----------|-------------|-------------|-------------|
| 593727743 | PREDICTED: collagen alpha-1(VI) chain [Physeter catodon]                                              | 10.03385  | 2.572626917 | 14.4561   | 3.006271031 | 1.440733118 | 0.120999911 |
| 154757413 | EIF6 protein [Bos taurus]                                                                             | 1.031675  | 0.424761675 | 1.481475  | 0.612096669 | 1.435990016 | 0.384936899 |
| 110331767 | EH-domain containing 1 [Bos taurus]                                                                   | 1.5507    | 0.987519575 | 2.223325  | 0.86807199  | 1.433755723 | 0.468684667 |
| 194038973 | PREDICTED: purine nucleoside phosphorylase isoform X1 [Sus scrofa]                                    | 1.0292    | 0.420730989 | 1.471575  | 0.492221644 | 1.429824135 | 0.546759582 |
| 148225172 | NADH dehydrogenase [ubiquinone] 1 alpha subcomplex subunit 4 [Sus scrofa]                             | 1.7554    | 0.245396186 | 2.47869   | 0.60705176  | 1.412037143 | 0.418220519 |
| 555956323 | PREDICTED: tropomyosin alpha-1 chain-like isoform X1 [Bos mutus]                                      | 129.185   | 43.75929339 | 180.0475  | 2.951077134 | 1.393718311 | 0.345376335 |
| 466017989 | PREDICTED: PRKC apoptosis WT1 regulator protein [Orcinus orca]                                        | 1.26038   | 0.257869159 | 1.75419   | 0.504653041 | 1.391794538 | 0.179006114 |
| 545862279 | PREDICTED: LOW QUALITY PROTEIN: laminin subunit beta-2 [Sus scrofa]                                   | 13.027775 | 1.841860835 | 18.108    | 4.103866043 | 1.389953388 | 0.371397769 |
| 47523866  | aldose 1-epimerase [Sus scrofa]                                                                       | 2.530725  | 0.333771692 | 3.50315   | 0.529351843 | 1.384247597 | 0.113946917 |
| 586449585 | PREDICTED: keratin, type I cytoskeletal 10 [Chrysochloris asiatica]                                   | 15.651725 | 3.877080995 | 21.64425  | 2.396142747 | 1.382866745 | 0.292309369 |
| 444727517 | Sorting nexin-12 [Tupaia chinensis]                                                                   | 2.533175  | 0.544161567 | 3.489825  | 0.672972286 | 1.377648603 | 0.452985295 |
| 350590267 | PREDICTED: dual specificity protein phosphatase 3 isoform 2 [Sus scrofa]                              | 3.441575  | 1.070507723 | 4.72725   | 0.22616664  | 1.373571693 | 0.292557331 |
| 617600588 | PREDICTED: chloride intracellular channel protein 4 [Erinaceus europaeus]                             | 3.064955  | 0.86015343  | 4.1957    | 0.520227274 | 1.368927113 | 0.172684508 |
| 14165469  | 40S ribosomal protein S15a [Homo sapiens]                                                             | 2.03198   | 0.430648594 | 2.773425  | 0.540247647 | 1.364887942 | 0.2403883   |
| 545868396 | PREDICTED: palladin [Sus scrofa]                                                                      | 10.2162   | 2.653495347 | 13.8811   | 2.065347778 | 1.358734167 | 0.3753886   |
| 545810360 | PREDICTED: perilipin-4 [Sus scrofa]                                                                   | 0.767825  | 0.487251147 | 1.04045   | 0.600719382 | 1.355061375 | 0.359980012 |
| 345786437 | PREDICTED: KN motif and ankyrin repeat domain-containing protein 2 isoformX1 [Canis lupus familiaris] | 1.804575  | 0.881584626 | 2.44415   | 0.578219936 | 1.35441863  | 0.463770462 |
| 350595800 | PREDICTED: SH3 domain-binding glutamic acid-rich-like protein-like [Sus scrofa]                       | 12.750675 | 3.233066558 | 17.18675  | 0.299844508 | 1.347909032 | 0.259086153 |
| 444722654 | T-complex protein 1 subunit delta [Tupaia chinensis]                                                  | 3.32618   | 1.166880068 | 4.470475  | 0.844149992 | 1.344026781 | 0.338577461 |
| 4506715   | 40S ribosomal protein S28 [Homo sapiens]                                                              | 2.78705   | 0.524948767 | 3.743375  | 0.508904969 | 1.343131627 | 0.061700102 |
| 335287916 | PREDICTED: integrin alpha-5 isoform 1 [Sus scrofa]                                                    | 3.816275  | 0.696689782 | 5.12245   | 1.341187982 | 1.342264381 | 0.484314315 |
| 545197429 | PREDICTED: histone H2A type 1-E-like [Equus caballus]                                                 | 9.501725  | 3.376317058 | 12.72675  | 4.289769018 | 1.339414685 | 0.651800203 |
| 281351987 | hypothetical protein PANDA_004938 [Ailuroglossus melanoleuca]                                         | 1.5028    | 0.654351418 | 2.01039   | 0.438221025 | 1.337762843 | 0.615573943 |
| 194043123 | PREDICTED: coronin-1C isoform X1 [Sus scrofa]                                                         | 5.036325  | 0.447751429 | 6.735     | 0.53687657  | 1.337284627 | 0.064926766 |
| 162287374 | polymerase I and transcript release factor isoform 2 [Bos taurus]                                     | 21.03875  | 2.966046453 | 28.04     | 3.038197602 | 1.332778801 | 0.141552484 |
| 118403904 | protein DJ-1 [Sus scrofa]                                                                             | 4.279925  | 0.280834181 | 5.70325   | 0.561162995 | 1.332558398 | 0.187209781 |
| 113205682 | protein S100-A6 [Sus scrofa]                                                                          | 2.81108   | 0.898576623 | 3.728615  | 0.981256383 | 1.326399462 | 0.13910146  |
| 554546398 | PREDICTED: uncharacterized protein LOC102248938 [Myotis brandtii]                                     | 35.76475  | 5.856715624 | 46.956    | 9.839650815 | 1.312912854 | 0.455225418 |
| 114051526 | coactosin-like protein [Bos taurus]                                                                   | 1.518005  | 0.30559001  | 1.98834   | 0.572781263 | 1.309837583 | 0.184420273 |
| 350593998 | PREDICTED: EF-hand domain-containing protein D1 [Sus scrofa]                                          | 3.04225   | 0.458667978 | 3.977525  | 0.560609215 | 1.307428712 | 0.112362335 |
| 149722119 | PREDICTED: 26S protease regulatory subunit 6B isoform 1 [Equus caballus]                              | 0.775325  | 0.493746702 | 1.0105525 | 0.732411783 | 1.303392126 | 0.746981565 |

|           |                                                                                                                      |           |             |           |             |             |             |
|-----------|----------------------------------------------------------------------------------------------------------------------|-----------|-------------|-----------|-------------|-------------|-------------|
| 162951821 | heterogeneous nuclear ribonucleoprotein A/B [Sus scrofa]                                                             | 1.49155   | 0.64528063  | 1.939875  | 0.766142521 | 1.300576581 | 0.770070384 |
| 157829918 | Chain A, Destrin, Nmr, Minimized Average Structure                                                                   | 10.606525 | 1.126258448 | 13.71595  | 2.590878938 | 1.293161521 | 0.202319846 |
| 556775761 | PREDICTED: vimentin [Pantholops hodgsonii]                                                                           | 227.3375  | 76.87556898 | 293.21    | 16.73376228 | 1.289756419 | 0.438023043 |
| 545207279 | PREDICTED: ATP synthase subunit gamma, mitochondrial isoform X2 [Equus caballus]                                     | 4.054975  | 0.649595464 | 5.2016    | 0.365836806 | 1.282769931 | 0.183054568 |
| 556727629 | PREDICTED: fatty acid-binding protein, heart isoform X2 [Pantholops hodgsonii]                                       | 2.553455  | 0.686771089 | 3.275075  | 0.690901406 | 1.282605333 | 0.527725063 |
| 350585312 | PREDICTED: basal cell adhesion molecule isoform X1 [Sus scrofa]                                                      | 4.521075  | 0.268415149 | 5.785075  | 1.017279163 | 1.279579525 | 0.285037185 |
| 545837210 | PREDICTED: thioredoxin domain-containing protein 5, partial [Sus scrofa]                                             | 0.771575  | 0.257242212 | 0.9859    | 0.570631168 | 1.277775978 | 0.677580829 |
| 545560279 | PREDICTED: LOW QUALITY PROTEIN: transcriptional activator protein Pur-beta [Canis lupus familiaris]                  | 10.62235  | 2.169090589 | 13.5705   | 1.778259519 | 1.277542163 | 0.336544375 |
| 126320832 | PREDICTED: T-complex protein 1 subunit epsilon [Monodelphis domestica]                                               | 2.530725  | 0.333771692 | 3.225775  | 0.180396491 | 1.274644618 | 0.07329543  |
| 281353832 | hypothetical protein PANDA_008751 [Ailuropoda melanoleuca]                                                           | 4.3013    | 0.800031619 | 5.479     | 0.28951373  | 1.273800944 | 0.214683206 |
| 554534292 | PREDICTED: keratin, type I cytoskeletal 14 [Myotis brandtii]                                                         | 6.32065   | 1.332417433 | 8.04195   | 2.764583091 | 1.272329586 | 0.559425712 |
| 655884340 | PREDICTED: LOW QUALITY PROTEIN: NADH dehydrogenase [ubiquinone] 1 alpha subcomplex subunit 6 [Oryctolagus cuniculus] | 0.771575  | 0.257242212 | 0.9812525 | 0.397217845 | 1.271752584 | 0.759416369 |
| 301783431 | PREDICTED: hypothetical protein LOC100468944 [Ailuropoda melanoleuca]                                                | 79.379    | 27.65839025 | 100.915   | 33.65308047 | 1.271306013 | 0.708948754 |
| 197099010 | 60S ribosomal protein L23 [Pongo abelii]                                                                             | 2.025755  | 0.724461265 | 2.5738275 | 1.247158156 | 1.270552214 | 0.685368718 |
| 545197486 | PREDICTED: histone H2A type 1-like [Equus caballus]                                                                  | 90.69825  | 17.86586175 | 115.07925 | 20.66740418 | 1.268814448 | 0.514641686 |
| 149728615 | PREDICTED: alpha/beta hydrolase domain-containing protein 14B [Equus caballus]                                       | 2.547255  | 0.678922227 | 3.23185   | 0.477150405 | 1.268757937 | 0.567034803 |
| 126722859 | 40S ribosomal protein S4 [Bos taurus]                                                                                | 1.807     | 0.778259677 | 2.28395   | 1.13690856  | 1.263945766 | 0.744415125 |
| 149744781 | PREDICTED: SH3 domain-binding glutamic acid-rich-like protein-like isoform X1 [Equus caballus]                       | 11.428775 | 1.953120849 | 14.41075  | 0.292990152 | 1.260918165 | 0.206290878 |
| 545880563 | PREDICTED: protein-glutamine gamma-glutamyltransferase 2 [Sus scrofa]                                                | 61.02275  | 8.481504057 | 76.54025  | 6.999119699 | 1.254290408 | 0.17770027  |
| 18777767  | dynein light chain roadblock-type 1 [Rattus norvegicus]                                                              | 1.00898   | 0.425388436 | 1.2612425 | 0.664493351 | 1.250017344 | 0.794736677 |
| 126337523 | PREDICTED: importin-5 isoform X1 [Monodelphis domestica]                                                             | 1.006505  | 0.022838214 | 1.2560175 | 0.272412578 | 1.247899911 | 0.410953137 |
| 505768901 | PREDICTED: lysine--tRNA ligase isoform X2 [Sorex araneus]                                                            | 1.006505  | 0.022838214 | 1.2560175 | 0.272412578 | 1.247899911 | 0.410953137 |
| 602708825 | PREDICTED: plectin [Lipotes vexillifer]                                                                              | 3.5637    | 1.016711115 | 4.431925  | 1.706692667 | 1.243630216 | 0.394339605 |
| 301785528 | PREDICTED: PDZ and LIM domain protein 7-like [Ailuropoda melanoleuca]                                                | 14.794075 | 2.775250332 | 18.359    | 2.312263141 | 1.24096978  | 0.378847811 |
| 560978056 | PREDICTED: plectin [Vicugna pacos]                                                                                   | 3.8816    | 2.249625966 | 4.8163    | 2.341130354 | 1.240802762 | 0.59853346  |
| 335310350 | PREDICTED: carbonyl reductase [NADPH] 1-like, partial [Sus scrofa]                                                   | 2.785925  | 0.790052329 | 3.438725  | 0.814821902 | 1.234320737 | 0.476211292 |
| 148230364 | heterogeneous nuclear ribonucleoprotein D0 [Bos taurus]                                                              | 1.9941    | 0.370857468 | 2.4601    | 0.601350429 | 1.233689384 | 0.467889234 |



|           |                                                                                                                                                                                                                                                                             |          |             |           |             |             |             |
|-----------|-----------------------------------------------------------------------------------------------------------------------------------------------------------------------------------------------------------------------------------------------------------------------------|----------|-------------|-----------|-------------|-------------|-------------|
| 149716550 | PREDICTED: platelet-activating factor acetylhydrolase IB subunit beta [ <i>Equus caballus</i> ]                                                                                                                                                                             | 1.807    | 0.778259677 | 2.228575  | 0.196507703 | 1.233301051 | 0.574429779 |
| 350586422 | PREDICTED: adenylyl cyclase-associated protein 2, partial [ <i>Sus scrofa</i> ]                                                                                                                                                                                             | 1.006505 | 0.022838214 | 1.2400525 | 0.235500938 | 1.232038092 | 0.431761829 |
| 21465643  | Chain B, Crystal Structure Of The Mammalian 20s Proteasome At 2.75 A Resolution                                                                                                                                                                                             | 4.84925  | 1.189176013 | 5.96205   | 0.685215042 | 1.229478785 | 0.47872135  |
| 431921648 | Keratin, type II cytoskeletal 1 [ <i>Pteropus alecto</i> ]                                                                                                                                                                                                                  | 40.3265  | 3.482752037 | 49.4775   | 4.352721074 | 1.226922743 | 0.235063617 |
| 28603770  | F-actin-capping protein subunit beta [ <i>Bos taurus</i> ]                                                                                                                                                                                                                  | 4.843    | 1.102504975 | 5.940025  | 0.429002064 | 1.226517654 | 0.456361893 |
| 411147409 | laminin subunit gamma-1 precursor [ <i>Sus scrofa</i> ]                                                                                                                                                                                                                     | 17.15375 | 2.850962743 | 20.92625  | 4.452607782 | 1.219922757 | 0.616231791 |
| 311259322 | PREDICTED: LOW QUALITY PROTEIN: chloride intracellular channel protein 1 [ <i>Sus scrofa</i> ]                                                                                                                                                                              | 0.769125 | 0.492675365 | 0.9366    | 0.9366      | 1.21774744  | 0.784314392 |
| 335305150 | PREDICTED: zyxin isoform X1 [ <i>Sus scrofa</i> ]                                                                                                                                                                                                                           | 6.354525 | 1.42574826  | 7.73685   | 1.421199159 | 1.217533962 | 0.200222494 |
| 444517659 | Galectin-1, partial [ <i>Tupaia chinensis</i> ]                                                                                                                                                                                                                             | 7.32945  | 1.213690126 | 8.915725  | 0.731589322 | 1.216424834 | 0.464394676 |
| 213021130 | proteasome subunit alpha type-6 [ <i>Ovis aries</i> ]                                                                                                                                                                                                                       | 2.247975 | 0.190682268 | 2.732825  | 0.231111461 | 1.215683004 | 0.166515154 |
| 548458608 | PREDICTED: F-actin-capping protein subunit alpha-1 [ <i>Capra hircus</i> ]                                                                                                                                                                                                  | 0.772875 | 0.772875    | 0.9366    | 0.9366      | 1.211838913 | 0.391002219 |
| 2497487   | RecName: Full=UMP-CMP kinase; AltName: Full=Deoxycytidylate kinase; Short=CK; Short=dCMP kinase; AltName: Full=Nucleoside-diphosphate kinase; AltName: Full=Uridine monophosphate/cytidine monophosphate kinase; Short=UMP/CMP kinase; Short=UMP/CMPK [ <i>Sus scrofa</i> ] | 2.060875 | 0.732242628 | 2.487375  | 0.279825405 | 1.206950931 | 0.464925018 |
| 162139823 | prelamin-A/C [ <i>Sus scrofa</i> ]                                                                                                                                                                                                                                          | 42.78225 | 2.773033338 | 51.59225  | 2.348401917 | 1.205926523 | 0.057785816 |
| 126722963 | calumenin isoform 2 precursor [ <i>Oryctolagus cuniculus</i> ]                                                                                                                                                                                                              | 1.235225 | 0.466896884 | 1.48754   | 0.661190142 | 1.204266429 | 0.836218043 |
| 146231742 | ubiquitin-conjugating enzyme E2N-like [ <i>Bos taurus</i> ]                                                                                                                                                                                                                 | 4.5614   | 0.92941628  | 5.481625  | 0.306983529 | 1.20174179  | 0.349888496 |
| 555994603 | PREDICTED: LOW QUALITY PROTEIN: ribosomal protein S19 [ <i>Bos mutus</i> ]                                                                                                                                                                                                  | 6.86095  | 1.157153891 | 8.244225  | 1.137794251 | 1.201615665 | 0.492356667 |
| 311277155 | PREDICTED: biglycan [ <i>Sus scrofa</i> ]                                                                                                                                                                                                                                   | 42.489   | 5.491151564 | 51.003    | 7.521545331 | 1.200381275 | 0.195546575 |
| 47523692  | thioredoxin [ <i>Sus scrofa</i> ]                                                                                                                                                                                                                                           | 9.36775  | 1.271172542 | 11.2335   | 0.791395655 | 1.199167356 | 0.366628784 |
| 301771378 | PREDICTED: proteasome activator complex subunit 1-like [ <i>Ailuropoda melanoleuca</i> ]                                                                                                                                                                                    | 1.0292   | 0.420730989 | 1.22874   | 0.474321155 | 1.193878741 | 0.712578513 |
| 504179152 | PREDICTED: histone H1.1-like [ <i>Ochotona princeps</i> ]                                                                                                                                                                                                                   | 74.49175 | 16.13945952 | 88.91375  | 12.81406797 | 1.193605332 | 0.61338643  |
| 47522760  | long-chain 3-ketoacyl-CoA thiolase [ <i>Sus scrofa</i> ]                                                                                                                                                                                                                    | 2.252875 | 0.870224313 | 2.686975  | 0.685112653 | 1.192687122 | 0.757444135 |
| 18087731  | dynein light chain 2, cytoplasmic [ <i>Mus musculus</i> ]                                                                                                                                                                                                                   | 2.547255 | 0.678922227 | 3.03485   | 0.65082687  | 1.191419783 | 0.640460409 |
| 655854442 | PREDICTED: LOW QUALITY PROTEIN: profilin-2 [ <i>Oryctolagus cuniculus</i> ]                                                                                                                                                                                                 | 2.526975 | 0.323941611 | 3.0102    | 0.462202501 | 1.191226664 | 0.179612141 |
| 586533349 | PREDICTED: glycogen phosphorylase, brain form isoform X1 [ <i>Pteropus alecto</i> ]                                                                                                                                                                                         | 1.266605 | 0.272091248 | 1.50875   | 0.505311959 | 1.191176413 | 0.633578133 |
| 585195860 | PREDICTED: serine/threonine-protein phosphatase 2A activator [ <i>Leptonychotes weddellii</i> ]                                                                                                                                                                             | 1.035425 | 0.597816427 | 1.231365  | 0.214574573 | 1.189236304 | 0.721837265 |
| 521021546 | Peptidyl-prolyl cis-trans isomerase NIMA-interacting 1 [ <i>Myotis brandtii</i> ]                                                                                                                                                                                           | 1.26038  | 0.257869159 | 1.4988525 | 0.295117345 | 1.189206827 | 0.656472165 |
| 126339314 | PREDICTED: cullin-associated NEDD8-dissociated protein 1-like [ <i>Monodelphis domestica</i> ]                                                                                                                                                                              | 4.57515  | 1.044120078 | 5.43575   | 0.503897401 | 1.188103122 | 0.480778418 |

|           |                                                                                                                                                                                                                               |           |             |           |             |             |             |
|-----------|-------------------------------------------------------------------------------------------------------------------------------------------------------------------------------------------------------------------------------|-----------|-------------|-----------|-------------|-------------|-------------|
| 157831033 | Chain A, Crevice-Forming Mutants In The Rigid Core Of Bovine Pancreatic Trypsin Inhibitor: Crystal Structures Of F22a, Y23a, N43g, And F45a                                                                                   | 4.296425  | 0.791842561 | 5.078575  | 1.396028434 | 1.182046702 | 0.682662587 |
| 327272802 | PREDICTED: 40S ribosomal protein S16 [Anolis carolinensis]                                                                                                                                                                    | 4.298875  | 0.67442198  | 5.072525  | 1.276541563 | 1.179965689 | 0.466138671 |
| 6919844   | RecName: Full=Transforming growth factor-beta-induced protein ig-h3; Short=Beta ig-h3; AltName: Full=Kerato-epithelin; AltName: Full=RGD-containing collagen-associated protein; Short=RGD-CAP; Flags: Precursor [Sus scrofa] | 5.492475  | 0.787387546 | 6.476775  | 1.365782247 | 1.179208827 | 0.264589329 |
| 149727536 | PREDICTED: UTP--glucose-1-phosphate uridylyltransferase isoformX2 [Equus caballus]                                                                                                                                            | 1.26413   | 0.266483331 | 1.490165  | 0.281379967 | 1.178806768 | 0.46830929  |
| 126307067 | PREDICTED: astrocytic phosphoprotein PEA-15 [Monodelphis domestica]                                                                                                                                                           | 2.7846    | 0.302121832 | 3.275075  | 0.690901406 | 1.176138404 | 0.532130403 |
| 528763338 | hypothetical protein CB1_000606063 [Camelus ferus]                                                                                                                                                                            | 32.53325  | 3.242089177 | 38.063    | 3.665989203 | 1.169972259 | 0.344357648 |
| 545873945 | PREDICTED: PDZ and LIM domain protein 3 isoform X1 [Sus scrofa]                                                                                                                                                               | 8.075125  | 1.646544249 | 9.44065   | 0.517864309 | 1.169102645 | 0.528783167 |
| 126310923 | PREDICTED: proteasome subunit alpha type-5 [Monodelphis domestica]                                                                                                                                                            | 2.765675  | 0.254137441 | 3.23185   | 0.477150405 | 1.168557405 | 0.264359223 |
| 545867751 | PREDICTED: collagen alpha-2(VI) chain [Sus scrofa]                                                                                                                                                                            | 21.704775 | 6.061201247 | 25.34625  | 2.881351199 | 1.16777299  | 0.538906978 |
| 121118    | RecName: Full=Gelsolin; AltName: Full=Actin-depolymerizing factor; Short=ADF; AltName: Full=Brevin; Flags: Precursor, partial [Sus scrofa]                                                                                    | 44.84425  | 2.934915058 | 52.36625  | 4.569996105 | 1.167736109 | 0.165225148 |
| 281349702 | hypothetical protein PANDA_003128 [Ailuropoda melanoleuca]                                                                                                                                                                    | 7.0822    | 1.303380129 | 8.25775   | 0.793135023 | 1.165986558 | 0.149295125 |
| 148352329 | septin-7 isoform 2 [Homo sapiens]                                                                                                                                                                                             | 7.0947    | 1.193249007 | 8.184575  | 0.440119371 | 1.153618194 | 0.275939425 |
| 664708095 | PREDICTED: phosphoglucomutase-like protein 5 [Equus przewalskii]                                                                                                                                                              | 29.19225  | 1.914739598 | 33.58775  | 3.19927399  | 1.150570785 | 0.215533548 |
| 478515717 | PREDICTED: histone H2B type 1-B-like [Ceratotherium simum simum]                                                                                                                                                              | 38.324    | 5.578462512 | 43.975    | 9.855226135 | 1.147453293 | 0.666416865 |
| 115495141 | serine/threonine-protein phosphatase 2A catalytic subunit beta isoform [Bos taurus]                                                                                                                                           | 1.514255  | 0.511249894 | 1.735625  | 0.237868656 | 1.146190701 | 0.656661828 |
| 432112608 | Keratin, type II cytoskeletal 5 [Myotis davidii]                                                                                                                                                                              | 17.22625  | 6.130506102 | 19.7375   | 7.452410354 | 1.145780422 | 0.826868341 |
| 164448580 | peptidyl-prolyl cis-trans isomerase FKBP2 isoform 1 [Bos taurus]                                                                                                                                                              | 1.518005  | 0.30559001  | 1.738225  | 0.647947138 | 1.145071986 | 0.696446641 |
| 344266889 | PREDICTED: keratin, type II cytoskeletal 1 [Loxodonta africana]                                                                                                                                                               | 37.066    | 4.242677948 | 42.40425  | 4.785517342 | 1.144020126 | 0.535495959 |
| 545806931 | PREDICTED: elongation factor 1-gamma [Sus scrofa]                                                                                                                                                                             | 1.270355  | 0.500408155 | 1.44955   | 0.602617002 | 1.141058995 | 0.827928896 |
| 511910681 | PREDICTED: keratin, type II cytoskeletal 1 [Mustela putorius furo]                                                                                                                                                            | 40.87075  | 4.620846899 | 46.6275   | 4.730145338 | 1.140852566 | 0.520209353 |
| 311276332 | PREDICTED: 3-hydroxyacyl-CoA dehydrogenase type-2 isoform 2 [Sus scrofa]                                                                                                                                                      | 6.066675  | 0.80607318  | 6.9126    | 0.733766235 | 1.139437995 | 0.613744691 |
| 281350953 | hypothetical protein PANDA_001716 [Ailuropoda melanoleuca]                                                                                                                                                                    | 1.781855  | 0.508344511 | 2.0297925 | 1.411841398 | 1.139145722 | 0.867830067 |
| 329664122 | ras-related protein Rab-5B [Bos taurus]                                                                                                                                                                                       | 8.787175  | 1.093297272 | 9.995375  | 1.16939645  | 1.137495839 | 0.544999332 |
| 126722713 | elongation factor 1-beta [Oryctolagus cuniculus]                                                                                                                                                                              | 1.52423   | 0.315995655 | 1.733     | 0.23271051  | 1.136967518 | 0.494165352 |

|           |                                                                                                                           |           |             |           |             |             |             |
|-----------|---------------------------------------------------------------------------------------------------------------------------|-----------|-------------|-----------|-------------|-------------|-------------|
| 305855180 | catechol O-methyltransferase [Sus scrofa]                                                                                 | 1.511805  | 0.662680133 | 1.71705   | 0.444685448 | 1.135761557 | 0.826407178 |
| 114051185 | programmed cell death protein 5 [Bos taurus]                                                                              | 3.29855   | 0.531040636 | 3.746     | 0.294198303 | 1.135650513 | 0.163879593 |
| 47716872  | galectin-1 [Sus scrofa]                                                                                                   | 25.35725  | 4.964055992 | 28.762    | 1.29962065  | 1.134271264 | 0.606390857 |
| 47523734  | protein phosphatase 1 regulatory subunit 14A [Sus scrofa]                                                                 | 6.995275  | 0.671803234 | 7.934475  | 0.381744023 | 1.134262055 | 0.118943323 |
| 545812163 | PREDICTED: histidine triad nucleotide-binding protein 1-like [Sus scrofa]                                                 | 1.746725  | 0.636188829 | 1.978475  | 0.386112759 | 1.132676867 | 0.668194913 |
| 187370723 | hydroxyacyl-coenzyme A dehydrogenase/3-ketoacyl-coenzyme A thiolase/enoyl-coenzyme A hydratase alpha subunit [Sus scrofa] | 9.649425  | 1.506336614 | 10.9256   | 1.548132761 | 1.132253994 | 0.375670977 |
| 505850104 | PREDICTED: alpha-actinin-3 [Sorex araneus]                                                                                | 25.796    | 3.67551849  | 29.2065   | 3.130216433 | 1.13221042  | 0.242941591 |
| 335289705 | PREDICTED: flavin reductase (NADPH) [Sus scrofa]                                                                          | 3.307225  | 1.011296314 | 3.743375  | 0.508904969 | 1.131877934 | 0.518734721 |
| 114051487 | cytochrome c [Bos taurus]                                                                                                 | 2.014325  | 0.73071291  | 2.274415  | 0.67958931  | 1.129120177 | 0.839672126 |
| 126723252 | heterogeneous nuclear ribonucleoprotein K [Oryctolagus cuniculus]                                                         | 6.85325   | 1.764151906 | 7.6903    | 1.130701459 | 1.122139131 | 0.528616568 |
| 28603774  | rho GDP-dissociation inhibitor 1 [Bos taurus]                                                                             | 7.04315   | 0.438239973 | 7.898575  | 0.859352338 | 1.121454889 | 0.254294058 |
| 586457760 | PREDICTED: lysozyme C [Chrysochloris asiatica]                                                                            | 2.2682    | 0.655242506 | 2.5419025 | 0.703916363 | 1.120669474 | 0.84071795  |
| 586480648 | PREDICTED: 60S ribosomal protein L31-like [Chrysochloris asiatica]                                                        | 2.039505  | 0.741451968 | 2.2778775 | 0.671850465 | 1.116877625 | 0.851154337 |
| 194211402 | PREDICTED: calcium-binding protein 39 isoform X1 [Equus caballus]                                                         | 1.778105  | 0.279648381 | 1.98574   | 0.379294633 | 1.116773194 | 0.334446264 |
| 345090969 | septin 2 [Sus scrofa]                                                                                                     | 3.7722    | 0.258303149 | 4.211675  | 0.692266973 | 1.116503632 | 0.458639266 |
| 311275457 | PREDICTED: filamin-C isoformX1 [Sus scrofa]                                                                               | 65.54525  | 3.79476333  | 73.08825  | 6.104492081 | 1.115080803 | 0.180313109 |
| 488529388 | PREDICTED: myosin-9 [Dasypus novemcinctus]                                                                                | 92.7255   | 3.382146323 | 103.36725 | 5.366208708 | 1.114766165 | 0.15265488  |
| 82465299  | filamin-A [Sus scrofa]                                                                                                    | 51.5625   | 5.209627794 | 57.47075  | 3.4937609   | 1.114584242 | 0.074065937 |
| 126723197 | calpain small subunit 1 [Oryctolagus cuniculus]                                                                           | 5.795475  | 0.796268028 | 6.44165   | 0.524789179 | 1.111496469 | 0.614146065 |
| 118403788 | glutathione S-transferase mu 2 [Sus scrofa]                                                                               | 4.254775  | 0.42590501  | 4.72725   | 0.22616664  | 1.111045825 | 0.105667983 |
| 340007404 | alpha-actinin-1 [Sus scrofa]                                                                                              | 115.883   | 10.83522738 | 128.3     | 11.54508914 | 1.107151178 | 0.158117808 |
| 655864464 | PREDICTED: LOW QUALITY PROTEIN: bromodomain adjacent to zinc finger domain protein 1A [Oryctolagus cuniculus]             | 11.902125 | 1.713106564 | 13.16915  | 1.343422714 | 1.106453679 | 0.425037782 |
| 478491393 | PREDICTED: dihydropyrimidinase-related protein 3 isoform 1 [Ceratotherium simum simum]                                    | 26.24275  | 2.576637388 | 28.86525  | 1.658964204 | 1.099932362 | 0.343598809 |
| 346986388 | profilin-1 [Sus scrofa]                                                                                                   | 55.1165   | 5.299464258 | 60.622    | 2.5720382   | 1.099888418 | 0.325798338 |
| 311248247 | PREDICTED: ATP synthase subunit delta, mitochondrial-like isoform 1 [Sus scrofa]                                          | 2.2731    | 0.285413869 | 2.496075  | 0.302489772 | 1.098092913 | 0.477569494 |
| 149751402 | PREDICTED: NAD(P)H-hydrate epimerase [Equus caballus]                                                                     | 2.03818   | 0.445316912 | 2.237275  | 0.230898511 | 1.097682737 | 0.775376708 |
| 149758330 | PREDICTED: guanine nucleotide-binding protein G(I)/G(S)/G(T) subunit beta-1 isoform X1 [Equus caballus]                   | 6.554325  | 0.577703881 | 7.187375  | 0.45924546  | 1.096585079 | 0.094199315 |
| 472382549 | PREDICTED: uncharacterized protein LOC101365636 [Odobenus rosmarus divergens]                                             | 5.54535   | 0.919003479 | 6.076975  | 1.702173882 | 1.095868611 | 0.822312031 |
| 149612407 | PREDICTED: pyruvate kinase PKM [Ornithorhynchus anatinus]                                                                 | 20.91425  | 2.089622987 | 22.90625  | 1.76328313  | 1.095246064 | 0.458722057 |
| 545887975 | PREDICTED: LanC lantibiotic synthetase component C-like 1 [Sus scrofa]                                                    | 2.288305  | 0.776752311 | 2.50594   | 0.516808759 | 1.095107514 | 0.725868444 |
| 528754126 | actin, cytoplasmic 1 [Camelus ferus]                                                                                      | 79.59875  | 2.410559388 | 87.14725  | 1.665239641 | 1.094831891 | 0.119447522 |

|           |                                                                                      |          |             |          |             |             |             |
|-----------|--------------------------------------------------------------------------------------|----------|-------------|----------|-------------|-------------|-------------|
| 586531235 | PREDICTED: EH domain-containing protein 4 [Pteropus alecto]                          | 4.797625 | 0.347182316 | 5.2495   | 1.151910002 | 1.094187228 | 0.660667028 |
| 114051223 | prohibitin-2 [Bos taurus]                                                            | 2.4891   | 0.603217499 | 2.721525 | 0.428321167 | 1.093377124 | 0.781981315 |
| 335294000 | PREDICTED: 3-hydroxybutyrate dehydrogenase type 2-like isoform 1 [Sus scrofa]        | 2.285855 | 0.649321367 | 2.496075 | 0.302489772 | 1.091965588 | 0.820826869 |
| 545859588 | PREDICTED: unconventional myosin-1c [Sus scrofa]                                     | 22.6025  | 3.578101976 | 24.67525 | 4.355374962 | 1.091704457 | 0.680428527 |
| 586993676 | PREDICTED: myosin-9 [Felis catus]                                                    | 111.4875 | 0.917990332 | 121.61   | 4.62177996  | 1.090794932 | 0.107402993 |
| 555986717 | PREDICTED: filamin-A isoform X2 [Bos mutus]                                          | 553.145  | 15.28308788 | 603.2    | 8.217488465 | 1.090491643 | 0.056319923 |
| 471418286 | PREDICTED: filamin-A isoform 2 [Trichechus manatus latirostris]                      | 533.665  | 14.77285433 | 580.8575 | 9.062945966 | 1.088430945 | 0.05469397  |
| 586564248 | PREDICTED: filamin-A isoform X2 [Pteropus alecto]                                    | 581.04   | 16.09713691 | 631.38   | 10.19054055 | 1.086637753 | 0.070615551 |
| 74008809  | PREDICTED: filamin-A isoform 2 [Canis lupus familiaris]                              | 587.8475 | 16.28637538 | 637.7625 | 9.773937602 | 1.084911478 | 0.084979188 |
| 47523318  | ubiquitin carboxyl-terminal hydrolase isozyme L1 [Sus scrofa]                        | 2.280955 | 1.063155807 | 2.4726   | 0.983311205 | 1.084019632 | 0.806931595 |
| 343887360 | proteasome (prosome, macropain) subunit, alpha type [Sus scrofa]                     | 2.045705 | 0.952006097 | 2.217265 | 0.71017819  | 1.083863509 | 0.613353384 |
| 667246325 | PREDICTED: ATP-dependent RNA helicase DDX3X isoform X1 [Galeopterus variegatus]      | 5.0301   | 0.427819275 | 5.433125 | 0.779684414 | 1.080122662 | 0.668850776 |
| 270289750 | non-specific lipid-transfer protein [Sus scrofa]                                     | 3.0158   | 0.413913848 | 3.25305  | 0.315878179 | 1.07866901  | 0.263941308 |
| 334311991 | PREDICTED: 14-3-3 protein theta isoform X1 [Monodelphis domestica]                   | 7.865    | 1.092542705 | 8.47325  | 0.342982314 | 1.0773363   | 0.578377479 |
| 655895781 | PREDICTED: calpain-2 catalytic subunit-like [Oryctolagus cuniculus]                  | 1.545775 | 1.545775    | 1.665125 | 0.976256742 | 1.077210461 | 0.920044005 |
| 335296245 | PREDICTED: cysteine and glycine-rich protein 1-like isoform 1 [Sus scrofa]           | 78.18575 | 8.355059948 | 84.20575 | 2.018870038 | 1.076996128 | 0.431408645 |
| 505794832 | PREDICTED: filamin-A [Sorex araneus]                                                 | 515.105  | 12.19733065 | 554.6625 | 6.919574138 | 1.076795022 | 0.051417459 |
| 338729679 | PREDICTED: LOW QUALITY PROTEIN: filamin-A [Equus caballus]                           | 571.795  | 13.09164969 | 615.625  | 9.973953161 | 1.076653346 | 0.075390125 |
| 281345571 | hypothetical protein PANDA_005634 [Ailuropoda melanoleuca]                           | 11.3304  | 0.946796772 | 12.19175 | 0.524172741 | 1.076021147 | 0.472052855 |
| 671031328 | PREDICTED: myosin light chain kinase, smooth muscle [Ursus maritimus]                | 13.8345  | 1.377487114 | 14.871   | 1.6063071   | 1.074921392 | 0.68482649  |
| 291405834 | PREDICTED: prohibitin [Oryctolagus cuniculus]                                        | 6.003675 | 0.83774931  | 6.451575 | 0.36082733  | 1.074604305 | 0.701972403 |
| 472390487 | PREDICTED: filamin-A [Odobenus rosmarus divergens]                                   | 541.91   | 16.02267716 | 582.3225 | 16.95934913 | 1.074574191 | 0.138609386 |
| 47523632  | proteasome activator complex subunit 2 [Sus scrofa]                                  | 2.27555  | 0.666016897 | 2.44415  | 0.578219936 | 1.074091978 | 0.884541193 |
| 470614409 | PREDICTED: tubulin beta chain-like [Tursiops truncatus]                              | 57.8905  | 2.149199483 | 62.1595  | 3.771517212 | 1.073742669 | 0.366724161 |
| 13775198  | SH3 domain-binding glutamic acid-rich-like protein 3 [Homo sapiens]                  | 3.273425 | 0.271492935 | 3.514475 | 0.57458207  | 1.073638467 | 0.504061753 |
| 15553463  | beta-actin [Oryctolagus cuniculus]                                                   | 145.2225 | 7.911307704 | 155.43   | 4.416267278 | 1.070288695 | 0.232248219 |
| 301777322 | PREDICTED: 2-oxoglutarate dehydrogenase, mitochondrial-like [Ailuropoda melanoleuca] | 0.729925 | 0.454899845 | 0.779025 | 0.49602796  | 1.067267185 | 0.947583602 |
| 2959454   | desmin [Sus scrofa]                                                                  | 266.23   | 12.03574191 | 284.055  | 4.324766853 | 1.066953386 | 0.320722843 |
| 478521049 | PREDICTED: collagen alpha-1(I) chain isoform 1 [Ceratotherium simum simum]           | 6.886825 | 2.101836437 | 7.339525 | 1.668548676 | 1.06573421  | 0.892126711 |
| 4506413   | ras-related protein Rap-1A precursor [Homo sapiens]                                  | 16.085   | 0.318292057 | 17.1235  | 0.969327301 | 1.064563258 | 0.269964172 |
| 47523488  | glutathione peroxidase 1 [Sus scrofa]                                                | 3.057405 | 0.845092517 | 3.250425 | 0.304534859 | 1.06313197  | 0.83461508  |

|           |                                                                                                                                                    |           |             |           |             |             |             |
|-----------|----------------------------------------------------------------------------------------------------------------------------------------------------|-----------|-------------|-----------|-------------|-------------|-------------|
| 433552070 | Chain A, Refined Crystal Structure Of Cytoplasmic Malate Dehydrogenase At 2.5-Angstroms Resolution                                                 | 6.76035   | 0.526783196 | 7.186525  | 1.317226897 | 1.063040375 | 0.711633973 |
| 545894385 | PREDICTED: myosin-11-like, partial [Sus scrofa]                                                                                                    | 95.7635   | 7.036972177 | 101.47575 | 1.979858092 | 1.059649553 | 0.458999714 |
| 545876122 | PREDICTED: collagen alpha-3(VI) chain isoformX2 [Sus scrofa]                                                                                       | 104.42875 | 21.03854809 | 110.433   | 18.63254408 | 1.05749614  | 0.802750381 |
| 395508878 | PREDICTED: T-complex protein 1 subunit eta [Sarcophilus harrisii]                                                                                  | 3.050875  | 0.765929017 | 3.225775  | 0.180396491 | 1.057327816 | 0.833519327 |
| 560923515 | PREDICTED: talin-1 [Camelus ferus]                                                                                                                 | 117.6355  | 8.139623266 | 124.305   | 5.194696815 | 1.05669632  | 0.1941455   |
| 347658971 | ATP synthase, H+ transporting, mitochondrial Fo complex, subunit d [Sus scrofa]                                                                    | 7.04805   | 0.465216019 | 7.444125  | 0.800026893 | 1.056196395 | 0.762877979 |
| 149755988 | PREDICTED: mitochondrial fission 1 protein [Equus caballus]                                                                                        | 3.30475   | 0.691726775 | 3.4872    | 0.292256602 | 1.055208412 | 0.827192145 |
| 148226851 | ATP synthase subunit f, mitochondrial [Sus scrofa]                                                                                                 | 4.045     | 0.464390775 | 4.2636    | 0.700496054 | 1.054042027 | 0.756295952 |
| 311252459 | PREDICTED: poly(rC)-binding protein 1 isoform X1 [Sus scrofa]                                                                                      | 3.79245   | 0.799463856 | 3.98015   | 0.376086831 | 1.049493072 | 0.778053669 |
| 545830727 | PREDICTED: alpha-actinin-4 isoformX2 [Sus scrofa]                                                                                                  | 96.687    | 11.04387244 | 101.31425 | 14.44063508 | 1.047858037 | 0.421831439 |
| 471411352 | PREDICTED: guanine nucleotide-binding protein subunit beta-2-like 1 [Trichechus manatus latirostris]                                               | 3.074905  | 1.279364888 | 3.214475  | 0.700794358 | 1.04539002  | 0.831336635 |
| 311270662 | PREDICTED: phosphatidylethanolamine-binding protein 1 [Sus scrofa]                                                                                 | 27.20875  | 1.511887142 | 28.338    | 0.586505044 | 1.041503193 | 0.370896738 |
| 335309939 | PREDICTED: nucleolin-like [Sus scrofa]                                                                                                             | 4.2886    | 0.681954887 | 4.4632    | 0.453699908 | 1.040712587 | 0.814924039 |
| 514483031 | PDZ and LIM domain protein 1 [Sus scrofa]                                                                                                          | 13.91705  | 1.545335401 | 14.481    | 0.658148286 | 1.040522237 | 0.711837576 |
| 135490    | RecName: Full=Tubulin beta chain; AltName: Full=Beta-tubulin [Sus scrofa]                                                                          | 44.465    | 0.686831857 | 46.14625  | 2.071913221 | 1.037810638 | 0.369871172 |
| 126341423 | PREDICTED: ras-related protein Rab-5A [Monodelphis domestica]                                                                                      | 3.6078    | 1.369417366 | 3.743375  | 0.508904969 | 1.037578303 | 0.909219577 |
| 594108752 | PREDICTED: tropomyosin alpha-3 chain-like, partial [Bubalus bubalis]                                                                               | 50.8085   | 2.246384076 | 52.70225  | 0.635189391 | 1.037272307 | 0.515079117 |
| 116242946 | RecName: Full=Actin, cytoplasmic 1; AltName: Full=Beta-actin; Contains: RecName: Full=Actin, cytoplasmic 1, N-terminally processed [Bos grunniens] | 759.3025  | 23.07020386 | 786.86    | 18.24283649 | 1.036293177 | 0.464742184 |
| 335280610 | PREDICTED: LOW QUALITY PROTEIN: talin-1 [Sus scrofa]                                                                                               | 117.1105  | 8.127525059 | 121.3175  | 5.80936367  | 1.035923337 | 0.346893093 |
| 488564479 | PREDICTED: myosin-11 isoform 1 [Dasyypus novemcinctus]                                                                                             | 409.3675  | 37.44154341 | 423.8775  | 17.93602073 | 1.035444924 | 0.588460147 |
| 254692804 | ras suppressor protein 1 [Ovis aries]                                                                                                              | 17.72525  | 2.257565185 | 18.33625  | 1.228852607 | 1.0344706   | 0.721147869 |
| 545867698 | PREDICTED: collagen alpha-1(XVIII) chain, partial [Sus scrofa]                                                                                     | 7.309425  | 0.571176437 | 7.559875  | 1.363032084 | 1.034263981 | 0.87260921  |
| 465965068 | PREDICTED: cysteine-rich protein 2 [Orcinus orca]                                                                                                  | 11.363625 | 1.175958286 | 11.74215  | 0.829644476 | 1.033310233 | 0.455974522 |
| 585701676 | PREDICTED: polyubiquitin-B-like [Elephantulus edwardii]                                                                                            | 18.70025  | 2.212612045 | 19.28325  | 2.46988422  | 1.031176054 | 0.774019783 |
| 311264396 | PREDICTED: prolargin isoform X1 [Sus scrofa]                                                                                                       | 37.17225  | 3.766579845 | 38.28075  | 1.591595498 | 1.029820632 | 0.695980185 |
| 359320104 | PREDICTED: creatine kinase B-type [Canis lupus familiaris]                                                                                         | 25.561    | 1.390363681 | 26.29925  | 1.627417349 | 1.02888189  | 0.822472656 |
| 560905580 | PREDICTED: myosin-11 isoform X1 [Camelus ferus]                                                                                                    | 481.145   | 46.07585096 | 493.52    | 22.18909304 | 1.025719897 | 0.721919941 |
| 194207324 | PREDICTED: cell division control protein 42 homolog [Equus caballus]                                                                               | 7.27155   | 1.070757061 | 7.45485   | 0.426121885 | 1.025207831 | 0.809061989 |
| 545834675 | PREDICTED: tubulointerstitial nephritis antigen-like 1 isoform X1 [Sus scrofa]                                                                     | 4.2156    | 0.924222595 | 4.314675  | 1.423889032 | 1.023501993 | 0.960395363 |

|           |                                                                                                         |          |             |           |             |             |             |
|-----------|---------------------------------------------------------------------------------------------------------|----------|-------------|-----------|-------------|-------------|-------------|
| 426234055 | PREDICTED: actin, alpha cardiac muscle 1, partial [Ovis aries]                                          | 1167.65  | 34.35356604 | 1194.55   | 50.87464169 | 1.023037725 | 0.697189911 |
| 118085932 | PREDICTED: 60S ribosomal protein L15 isoform X3 [Gallus gallus]                                         | 1.002755 | 0.415149412 | 1.02449   | 0.427279593 | 1.021675285 | 0.248971411 |
| 118419977 | beta-actin, partial [Eubalaena glacialis]                                                               | 810.49   | 23.64800238 | 828.025   | 18.31451542 | 1.02163506  | 0.643088375 |
| 47523544  | tenascin precursor [Sus scrofa]                                                                         | 1.940025 | 1.008668479 | 1.981075  | 0.715483137 | 1.021159521 | 0.953802824 |
| 346421409 | transgelin [Sus scrofa]                                                                                 | 405.495  | 31.37650647 | 413.9625  | 34.1881535  | 1.020881885 | 0.760187956 |
| 478535539 | PREDICTED: myosin-11 isoform 1 [Ceratotherium simum simum]                                              | 453.2575 | 42.0935746  | 462.49    | 17.09522399 | 1.020369216 | 0.78111452  |
| 311252403 | PREDICTED: sepiapterin reductase [Sus scrofa]                                                           | 8.532275 | 0.838412871 | 8.701475  | 0.973888362 | 1.019830584 | 0.806245496 |
| 335294283 | PREDICTED: protein kinase C delta-binding protein-like [Sus scrofa]                                     | 11.85065 | 1.388487591 | 12.073625 | 2.305460306 | 1.018815424 | 0.871722529 |
| 149720909 | PREDICTED: haloacid dehalogenase-like hydrolase domain-containing protein 2 isoform X1 [Equus caballus] | 0.765375 | 0.486800411 | 0.779025  | 0.49602796  | 1.017834395 | 0.986172946 |
| 344293080 | PREDICTED: heat shock cognate 71 kDa protein [Loxodonta africana]                                       | 28.618   | 1.096090781 | 29.089    | 0.67896183  | 1.016458173 | 0.468032315 |
| 511958474 | PREDICTED: myosin-11 isoform X2 [Mustela putorius furo]                                                 | 466.81   | 42.26036027 | 474.3125  | 21.64961831 | 1.016071849 | 0.791903312 |
| 594051609 | PREDICTED: myosin-11 isoform X3 [Bubalus bubalis]                                                       | 493.7775 | 44.42864642 | 501.3925  | 21.90392825 | 1.015421926 | 0.825630595 |
| 349732238 | transaldolase [Sus scrofa]                                                                              | 6.598425 | 0.978898528 | 6.69705   | 0.527990206 | 1.014946749 | 0.933594724 |
| 594051607 | PREDICTED: myosin-11 isoform X2 [Bubalus bubalis]                                                       | 503.525  | 45.21178027 | 510.3625  | 21.18454837 | 1.013579266 | 0.845497809 |
| 395510320 | PREDICTED: beta-actin-like protein 2 [Sarcophilus harrisi]                                              | 574.9525 | 21.8765759  | 582.335   | 8.8715552   | 1.012840191 | 0.797849738 |
| 488567906 | PREDICTED: LOW QUALITY PROTEIN: calponin 1, basic, smooth muscle [Dasypus novemcinctus]                 | 17.7025  | 3.378650754 | 17.922    | 1.908153863 | 1.012399379 | 0.963187102 |
| 291405401 | PREDICTED: 14-3-3 protein epsilon isoform X1 [Oryctolagus cuniculus]                                    | 7.60865  | 1.172556644 | 7.69365   | 1.272191288 | 1.011171496 | 0.930927139 |
| 146198759 | 15 kDa selenoprotein precursor [Sus scrofa]                                                             | 0.74888  | 0.25054158  | 0.7570025 | 0.496569994 | 1.010846197 | 0.989658351 |
| 311265878 | PREDICTED: inter-alpha-trypsin inhibitor heavy chain H5-like [Sus scrofa]                               | 4.33775  | 1.108388318 | 4.3799425 | 1.991135008 | 1.009726817 | 0.985849628 |
| 585679399 | PREDICTED: myosin regulatory light polypeptide 9 isoform X2 [Elephantulus edwardii]                     | 34.9375  | 5.604046343 | 35.23025  | 2.684309016 | 1.008379249 | 0.945990554 |
| 110331787 | actin related protein 2/3 complex subunit 1B [Bos taurus]                                               | 0.74643  | 0.249601883 | 0.7517525 | 0.491872881 | 1.007130608 | 0.994560992 |
| 545502107 | PREDICTED: myosin-11 isoform X31 [Canis lupus familiaris]                                               | 478.2975 | 43.36256669 | 481.6825  | 20.076938   | 1.007077185 | 0.910067121 |
| 593743500 | PREDICTED: myosin-11 isoform X4 [Physeter catodon]                                                      | 477.3425 | 42.71058619 | 479.9275  | 19.3345767  | 1.005415399 | 0.934532054 |
| 426247306 | PREDICTED: phosphatidylethanolamine-binding protein 1 [Ovis aries]                                      | 18.335   | 1.399986607 | 18.43075  | 1.306623982 | 1.005222253 | 0.960720388 |
| 410985147 | PREDICTED: myosin-11 [Felis catus]                                                                      | 469.2275 | 39.96916778 | 471.6775  | 19.50757305 | 1.005221348 | 0.927346831 |
| 115495671 | neuroplastin precursor [Bos taurus]                                                                     | 0.9838   | 0.384508229 | 0.988525  | 0.383544768 | 1.004802805 | 0.995465867 |
| 11321591  | high mobility group protein B2 [Homo sapiens]                                                           | 0.51525  | 0.51525     | 0.5176    | 0.5176      | 1.004560893 | 0.997951554 |
| 335295652 | PREDICTED: laminin subunit beta-1 isoform X1 [Sus scrofa]                                               | 1.76535  | 0.64901617  | 1.772775  | 0.889970588 | 1.004205965 | 0.996249334 |
| 350578365 | PREDICTED: LOW QUALITY PROTEIN: laminin subunit alpha-4 [Sus scrofa]                                    | 6.491125 | 1.256216695 | 6.516825  | 0.977218464 | 1.003959252 | 0.985502692 |
| 14141193  | 40S ribosomal protein S9 [Homo sapiens]                                                                 | 1.5407   | 0.662667047 | 1.54469   | 0.678638135 | 1.002589732 | 0.997158433 |
| 296472241 | TPA: alpha-actinin-2 [Bos taurus]                                                                       | 22.3635  | 8.05206591  | 22.404    | 8.195667097 | 1.001810987 | 0.984826227 |

|           |                                                                                                               |          |             |           |             |              |             |
|-----------|---------------------------------------------------------------------------------------------------------------|----------|-------------|-----------|-------------|--------------|-------------|
| 134104894 | Chain A, Structure Of Camp-Dependent Protein Kinase Complexed With A- 443654                                  | 2.48665  | 0.599551312 | 2.489975  | 0.288166978 | 1.00133714   | 0.996983515 |
| 151556324 | CLTLB protein [Bos taurus]                                                                                    | 0        | 0           | 0.7271    | 0.4533045   | #DIV/0!      | 0.207050872 |
| 602714922 | PREDICTED: chaperonin CPN60-1, mitochondrial-like, partial [Lipotes vexillifer]                               | 0        | 0           | 0.485675  | 0.485675    | #DIV/0!      | 0.391002219 |
| 305855162 | ELAV-like protein 1 [Sus scrofa]                                                                              | 0        | 0           | 0.4683    | 0.4683      | #DIV/0!      | 0.391002219 |
| 335283403 | PREDICTED: lamin-B1 isoform X1 [Sus scrofa]                                                                   | 0        | 0           | 0.4683    | 0.4683      | #DIV/0!      | 0.391002219 |
|           |                                                                                                               |          |             |           |             |              |             |
| 153792600 | fatty acid synthase [Sus scrofa]                                                                              | 6.160875 | 2.882075284 | 0.5176    | 0.5176      | -11.90277241 | 0.098587972 |
| 667247687 | PREDICTED: delta-1-pyrroline-5-carboxylate dehydrogenase, mitochondrial [Galeopterus variegatus]              | 1.24765  | 0.474066188 | 0.24284   | 0.24284     | -5.137745017 | 0.099491641 |
| 212549619 | ERO1-like protein alpha precursor [Sus scrofa]                                                                | 1.238975 | 0.471775848 | 0.2588    | 0.2588      | -4.78738408  | 0.261005804 |
| 1304179   | fibrinogen A-alpha-chain [Sus scrofa]                                                                         | 1.237675 | 0.466545088 | 0.261425  | 0.261425    | -4.734340633 | 0.084691496 |
| 291409329 | PREDICTED: LOW QUALITY PROTEIN: prolow-density lipoprotein receptor-related protein 1 [Oryctolagus cuniculus] | 3.28095  | 0.66484621  | 0.763065  | 0.254884778 | -4.299699239 | 0.069659192 |
| 545880794 | PREDICTED: adenosine deaminase [Sus scrofa]                                                                   | 0.98755  | 0.38462955  | 0.2341525 | 0.2341525   | -4.217550528 | 0.187408776 |
| 158429133 | Chain A, C28s Mutant Of Succinyl-Coa:3-Ketoacid Coa Transferase From Pig Heart                                | 4.20285  | 1.332005033 | 0.9972175 | 0.026036997 | -4.214577061 | 0.095570026 |
| 115496662 | cAMP-dependent protein kinase type I-alpha regulatory subunit [Bos taurus]                                    | 1.01273  | 0.425424122 | 0.24284   | 0.24284     | -4.170359084 | 0.222501527 |
| 194037005 | PREDICTED: ribonuclease UK114 isoform 1 [Sus scrofa]                                                          | 1.023    | 0.59066107  | 0.2588    | 0.2588      | -3.952859351 | 0.393940074 |
| 342349319 | calnexin precursor [Sus scrofa]                                                                               | 2.702625 | 1.171195403 | 0.7384175 | 0.247188426 | -3.660022954 | 0.19165605  |
| 343790920 | fumarate hydratase [Sus scrofa]                                                                               | 1.75165  | 0.637018328 | 0.4955775 | 0.286987013 | -3.534563212 | 0.18470584  |
| 11514531  | Chain A, Fructose-1,6-Bisphosphatase (Mutant Y57w) ProductZN COMPLEX (R-State)                                | 1.746725 | 0.636188829 | 0.4955775 | 0.286987013 | -3.524625311 | 0.072520899 |
| 545806760 | PREDICTED: atlastin-3 [Sus scrofa]                                                                            | 0.775325 | 0.493746702 | 0.2341525 | 0.2341525   | -3.311196763 | 0.18217009  |
| 343790922 | phospholipase C, delta 1 [Sus scrofa]                                                                         | 0.77405  | 0.496985842 | 0.2341525 | 0.2341525   | -3.305751594 | 0.467192101 |
| 149725788 | PREDICTED: elongation factor Tu, mitochondrial [Equus caballus]                                               | 0.77405  | 0.496985842 | 0.2341525 | 0.2341525   | -3.305751594 | 0.467192101 |
| 350592528 | PREDICTED: endoplasmic reticulum resident protein 29 [Sus scrofa]                                             | 0.772875 | 0.772875    | 0.2341525 | 0.2341525   | -3.300733496 | 0.391002219 |
| 444526054 | Dihydrolipoyl dehydrogenase, mitochondrial [Tupaia chinensis]                                                 | 3.237975 | 0.69689868  | 0.9859    | 0.570631168 | -3.284283396 | 0.093472785 |
| 47522940  | dihydrolipoyl dehydrogenase, mitochondrial precursor [Sus scrofa]                                             | 4.523525 | 0.66128086  | 1.46814   | 0.618515023 | -3.081126459 | 0.096019624 |
| 545855978 | PREDICTED: lysosome-associated membrane glycoprotein 1 isoform X1 [Sus scrofa]                                | 2.97415  | 0.75157072  | 0.96994   | 0.383071264 | -3.06632369  | 0.140625466 |
| 12082134  | heat shock protein 90 beta [Equus caballus]                                                                   | 12.534   | 1.056477717 | 4.177775  | 2.412228448 | -3.000161569 | 0.053270731 |
| 545805333 | PREDICTED: 14 kDa phosphohistidine phosphatase isoform X2 [Sus scrofa]                                        | 0.769125 | 0.492675365 | 0.2588    | 0.2588      | -2.97188949  | 0.498788177 |
| 545843364 | PREDICTED: LOW QUALITY PROTEIN: cytoplasmic dynein 1 heavy chain 1 [Sus scrofa]                               | 7.75825  | 4.647166563 | 2.67125   | 2.67125     | -2.904351895 | 0.49233898  |
| 602717035 | PREDICTED: tubulointerstitial nephritis antigen-like isoform X1 [Lipotes vexillifer]                          | 3.725475 | 1.285504361 | 1.294     | 1.294       | -2.879037867 | 0.188312399 |
| 56711370  | LIM and cysteine-rich domains protein 1 [Sus scrofa]                                                          | 4.493775 | 1.679479704 | 1.675015  | 1.030566864 | -2.682826721 | 0.184931023 |

|           |                                                                                                                                                                                                                                              |          |             |           |             |              |             |
|-----------|----------------------------------------------------------------------------------------------------------------------------------------------------------------------------------------------------------------------------------------------|----------|-------------|-----------|-------------|--------------|-------------|
| 545889716 | PREDICTED: cytochrome P450 1B1-like, partial [Sus scrofa]                                                                                                                                                                                    | 5.94365  | 2.765693128 | 2.257875  | 1.132381063 | -2.632408791 | 0.111360356 |
| 809283    | Chain B, Structure Determination Of Aquomet Porcine Hemoglobin At 2.8 Angstrom Resolution                                                                                                                                                    | 87.1385  | 38.53431268 | 33.2095   | 8.282494818 | -2.623902799 | 0.216870632 |
| 261245058 | hemoglobin subunit beta [Sus scrofa]                                                                                                                                                                                                         | 86.90725 | 38.71527665 | 33.16875  | 7.653926524 | -2.620154513 | 0.225976476 |
| 122465    | RecName: Full=Hemoglobin subunit alpha; AltName: Full=Alpha-globin; AltName: Full=Hemoglobin alpha chain [Sus scrofa]                                                                                                                        | 39.1875  | 11.97332431 | 15.188975 | 3.372778098 | -2.579996346 | 0.131069506 |
| 449081295 | RecName: Full=Aminopeptidase N; Short=AP-N; Short=pAPN; AltName: Full=Alanyl aminopeptidase; AltName: Full=Aminopeptidase M; Short=AP-M; AltName: Full=Microsomal aminopeptidase; AltName: Full=gp130; AltName: CD_antigen=CD13 [Sus scrofa] | 4.330225 | 0.924797876 | 1.6837    | 0.793919705 | -2.571850686 | 0.17785867  |
| 157834775 | Chain A, Crystallographic Refinement And Atomic Models Of Two Different Forms Of Citrate Synthase At 2.7 And 1.7 Angstroms Resolution                                                                                                        | 4.47815  | 1.27738105  | 1.75419   | 0.504653041 | -2.552830651 | 0.185699335 |
| 229368698 | ribosomal protein S6 (predicted) [Dasypus novemcinctus]                                                                                                                                                                                      | 1.279325 | 0.637614484 | 0.5176    | 0.5176      | -2.471647991 | 0.445736625 |
| 431891794 | Syntenin-1 [Pteropus alecto]                                                                                                                                                                                                                 | 1.7616   | 0.496069352 | 0.7357925 | 0.2461123   | -2.394153243 | 0.0870198   |
| 47522770  | clusterin precursor [Sus scrofa]                                                                                                                                                                                                             | 2.9704   | 1.041802217 | 1.269925  | 0.77265852  | -2.33903577  | 0.106090262 |
| 311265713 | PREDICTED: integrin alpha-8 [Sus scrofa]                                                                                                                                                                                                     | 5.181775 | 1.428679098 | 2.231175  | 0.471601867 | -2.322442211 | 0.16969718  |
| 335293373 | PREDICTED: UDP-glucose 6-dehydrogenase isoform 1 [Sus scrofa]                                                                                                                                                                                | 4.5387   | 1.002657048 | 1.95584   | 0.881408161 | -2.320588596 | 0.205792828 |
| 264681430 | 3-ketoacyl-CoA thiolase, mitochondrial [Sus scrofa]                                                                                                                                                                                          | 1.76405  | 0.886581106 | 0.763065  | 0.254884778 | -2.311795194 | 0.269627441 |
| 149750911 | PREDICTED: 40S ribosomal protein S2 [Equus caballus]                                                                                                                                                                                         | 1.788375 | 1.05135134  | 0.779025  | 0.49602796  | -2.295658034 | 0.479719854 |
| 126327421 | PREDICTED: high mobility group protein B1 isoform X2 [Monodelphis domestica]                                                                                                                                                                 | 2.243075 | 0.863086333 | 0.9859    | 0.570631168 | -2.275154681 | 0.343963829 |
| 114052342 | vesicle-associated membrane protein 3 [Bos taurus]                                                                                                                                                                                           | 2.7846   | 0.302121832 | 1.23399   | 0.477445212 | -2.256582306 | 0.060640028 |
| 262072947 | dihydrolipoamide dehydrogenase [Sus scrofa]                                                                                                                                                                                                  | 2.250425 | 0.467062645 | 0.9998425 | 0.427784253 | -2.250779498 | 0.197948978 |
| 164359    | apolipoprotein A-I [Sus scrofa]                                                                                                                                                                                                              | 2.238    | 0.739217547 | 0.9972175 | 0.026036997 | -2.244244611 | 0.186946687 |
| 25777713  | S-phase kinase-associated protein 1 isoform b [Homo sapiens]                                                                                                                                                                                 | 0.520175 | 0.520175    | 0.2341525 | 0.2341525   | -2.221522299 | 0.684174184 |
| 335284501 | PREDICTED: cytochrome b-c1 complex subunit 2, mitochondrial-like [Sus scrofa]                                                                                                                                                                | 2.18115  | 1.152394615 | 0.987325  | 0.687045318 | -2.209150989 | 0.12445382  |
| 126272971 | PREDICTED: annexin A8-like [Monodelphis domestica]                                                                                                                                                                                           | 0.51525  | 0.51525     | 0.2341525 | 0.2341525   | -2.200488998 | 0.391002219 |
| 14141157  | heterogeneous nuclear ribonucleoprotein H3 isoform a [Homo sapiens]                                                                                                                                                                          | 1.031675 | 0.424761675 | 0.4769925 | 0.275483085 | -2.162874678 | 0.456668256 |
| 149727574 | PREDICTED: spectrin beta chain, non-erythrocytic 1 isoform X1 [Equus caballus]                                                                                                                                                               | 4.018225 | 1.254886736 | 1.939875  | 0.766142521 | -2.071383465 | 0.241379766 |
| 15431303  | 60S ribosomal protein L9 [Homo sapiens]                                                                                                                                                                                                      | 1.539425 | 0.657842919 | 0.744475  | 0.468041151 | -2.067799456 | 0.495705299 |
| 429836835 | signal peptidase complex catalytic subunit SEC11A isoform 6 [Homo sapiens]                                                                                                                                                                   | 1.01273  | 0.425424122 | 0.4929525 | 0.28531688  | -2.054417008 | 0.154625988 |
| 545815836 | PREDICTED: fumarylacetoacetate hydrolase domain-containing protein 2-like [Sus scrofa]                                                                                                                                                       | 1.543175 | 0.51449313  | 0.7543775 | 0.252656581 | -2.045627024 | 0.058477265 |
| 117661065 | RPL35 [Sus scrofa]                                                                                                                                                                                                                           | 1.02545  | 0.414620763 | 0.50164   | 0.289915006 | -2.04419504  | 0.477810785 |
| 298160991 | actin-related protein 2/3 complex subunit 2 [Sus scrofa]                                                                                                                                                                                     | 2.5345   | 0.683189397 | 1.2400525 | 0.235500938 | -2.043865078 | 0.206727527 |



|           |                                                                                                        |           |             |           |             |              |             |
|-----------|--------------------------------------------------------------------------------------------------------|-----------|-------------|-----------|-------------|--------------|-------------|
| 149698113 | PREDICTED: peptidyl-prolyl cis-trans isomerase D [Equus caballus]                                      | 2.014325  | 0.73071291  | 0.9972175 | 0.026036997 | -2.019945498 | 0.270492921 |
| 149720524 | PREDICTED: malectin [Equus caballus]                                                                   | 0.98755   | 0.38462955  | 0.4955775 | 0.286987013 | -1.992725658 | 0.491216636 |
| 295442674 | 2,4-dienoyl-CoA reductase 1 [Sus scrofa]                                                               | 0.520175  | 0.520175    | 0.261425  | 0.261425    | -1.98976762  | 0.719397173 |
| 115496280 | annexin A7 [Bos taurus]                                                                                | 5.40275   | 2.193686865 | 2.748775  | 0.278616177 | -1.96551191  | 0.353795202 |
| 545822821 | PREDICTED: pre-B-cell leukemia transcription factor-interacting protein 1 [Sus scrofa]                 | 1.52913   | 0.907275105 | 0.779025  | 0.49602796  | -1.962876673 | 0.230846412 |
| 156523130 | surfeit locus protein 4 [Bos taurus]                                                                   | 1.48505   | 0.859604348 | 0.76044   | 0.493036547 | -1.952882542 | 0.20488549  |
| 221136947 | delta-sarcoglycan [Sus scrofa]                                                                         | 0.50775   | 0.50775     | 0.261425  | 0.261425    | -1.942239648 | 0.391002219 |
| 545845559 | PREDICTED: fibrinogen beta chain isoform X2 [Sus scrofa]                                               | 0.46985   | 0.46985     | 0.24284   | 0.24284     | -1.934813046 | 0.391002219 |
| 178056753 | glycogen phosphorylase, liver form [Sus scrofa]                                                        | 4.784925  | 0.663816362 | 2.489975  | 0.288166978 | -1.92167592  | 0.081124968 |
| 641692928 | PREDICTED: dihydrolipoyl dehydrogenase, mitochondrial isoform X1 [Eptesicus fuscus]                    | 3.751925  | 0.727702031 | 1.98574   | 0.379294633 | -1.889434166 | 0.18441278  |
| 13386338  | ras-related protein Rap-2b precursor [Mus musculus]                                                    | 2.2731    | 0.285413869 | 1.206715  | 0.585047036 | -1.883709078 | 0.271383643 |
| 585169082 | PREDICTED: heat shock protein HSP 90-beta-like [Leptonychotes weddellii]                               | 3.216875  | 1.155460439 | 1.713     | 0.997613332 | -1.877918856 | 0.51026988  |
| 432106259 | Calpain-2 catalytic subunit [Myotis davidii]                                                           | 5.83305   | 0.860200994 | 3.2072    | 0.408862658 | -1.818735969 | 0.069826564 |
| 13937391  | guanine nucleotide-binding protein G(I)/G(S)/G(T) subunit beta-2 [Mus musculus]                        | 2.846175  | 1.655408299 | 1.568525  | 1.568525    | -1.814555076 | 0.685301003 |
| 560901208 | PREDICTED: myosin-10 isoform X5 [Camelus ferus]                                                        | 100.2375  | 34.02913712 | 55.46175  | 32.70720111 | -1.807326671 | 0.187828002 |
| 115496898 | histone H1.0 [Bos taurus]                                                                              | 1.79705   | 0.641654173 | 0.9972175 | 0.026036997 | -1.802064244 | 0.293040893 |
| 545819203 | PREDICTED: very long-chain specific acyl-CoA dehydrogenase, mitochondrial-like isoform X3 [Sus scrofa] | 1.780555  | 0.510645139 | 0.9972175 | 0.026036997 | -1.785523218 | 0.207928031 |
| 521035382 | Spectrin alpha chain, brain [Myotis brandtii]                                                          | 9.282     | 1.36351891  | 5.20365   | 1.376197988 | -1.783747946 | 0.079628982 |
| 47523726  | dolichyl-diphosphooligosaccharide--protein glycosyltransferase subunit 1 precursor [Sus scrofa]        | 6.96365   | 1.303275255 | 3.97145   | 0.758591401 | -1.753427589 | 0.206486857 |
| 15718687  | 40S ribosomal protein S3 isoform 1 [Homo sapiens]                                                      | 3.0839    | 1.108603285 | 1.7602775 | 0.276514646 | -1.75193968  | 0.375746643 |
| 281348394 | hypothetical protein PANDA_006316 [Ailuropoda melanoleuca]                                             | 1.78705   | 1.123608558 | 1.02709   | 0.739631315 | -1.739915684 | 0.304683022 |
| 47522630  | aspartate aminotransferase, mitochondrial precursor [Sus scrofa]                                       | 12.930525 | 3.151648554 | 7.446175  | 0.536719305 | -1.736532515 | 0.211204304 |
| 335285324 | PREDICTED: prenylcysteine oxidase 1 isoform X1 [Sus scrofa]                                            | 3.445325  | 1.072457766 | 1.994425  | 0.052079529 | -1.727477844 | 0.279273618 |
| 225735713 | thy-1 membrane glycoprotein precursor [Sus scrofa]                                                     | 2.526975  | 0.323941611 | 1.465515  | 0.448395934 | -1.724291461 | 0.206306058 |
| 281338460 | hypothetical protein PANDA_002264 [Ailuropoda melanoleuca]                                             | 2.9844    | 0.895018232 | 1.735625  | 0.237868656 | -1.719495859 | 0.175885816 |
| 833798    | albumin [Sus scrofa]                                                                                   | 12.107375 | 3.564518792 | 7.057025  | 1.219459758 | -1.715648591 | 0.239224044 |
| 300796787 | integrin alpha-7 [Bos taurus]                                                                          | 5.15045   | 1.792714262 | 3.002925  | 0.599757772 | -1.715144401 | 0.256087414 |
| 545826025 | PREDICTED: ATP synthase subunit beta, mitochondrial [Sus scrofa]                                       | 43.737    | 7.773384816 | 25.5665   | 2.387925617 | -1.710715194 | 0.094175489 |
| 21703344  | GTP-binding protein SAR1a [Mus musculus]                                                               | 2.547255  | 0.678922227 | 1.490165  | 0.281379967 | -1.709377821 | 0.186016784 |
| 1942990   | Chain E, Structure Of Bovine Heart Cytochrome C Oxidase At The Fully Oxidized State                    | 2.51425   | 0.661907303 | 1.471575  | 0.492221644 | -1.708543567 | 0.077002703 |
| 149726611 | PREDICTED: transmembrane emp24 domain-containing protein 9 [Equus caballus]                            | 2.50805   | 0.273854041 | 1.4829025 | 0.477698068 | -1.691311465 | 0.105311968 |

|           |                                                                                                      |           |             |           |             |              |             |
|-----------|------------------------------------------------------------------------------------------------------|-----------|-------------|-----------|-------------|--------------|-------------|
| 545857842 | PREDICTED: membrane primary amine oxidase [Sus scrofa]                                               | 81.58075  | 13.95086903 | 48.797    | 8.107382634 | -1.671839457 | 0.108289056 |
| 545497341 | PREDICTED: LOW QUALITY PROTEIN: oligoribonuclease, mitochondrial [Canis lupus familiaris]            | 2.4602    | 0.784363305 | 1.4742    | 0.250836351 | -1.668837336 | 0.272196413 |
| 343887367 | collagen, type I, alpha 2 precursor [Sus scrofa]                                                     | 5.182925  | 1.764956559 | 3.10799   | 1.659086836 | -1.667613152 | 0.45305447  |
| 466065834 | PREDICTED: fibrillin-1 isoform 1 [Orcinus orca]                                                      | 48.58975  | 10.31637562 | 29.29875  | 11.5011143  | -1.658423994 | 0.126457917 |
| 149725016 | PREDICTED: microfibril-associated glycoprotein 4 [Equus caballus]                                    | 13.1784   | 2.036812705 | 7.967025  | 1.111136312 | -1.654118068 | 0.069421647 |
| 126337145 | PREDICTED: cytoplasmic FMR1-interacting protein 1 isoform 1 [Monodelphis domestica]                  | 1.2439    | 0.47465323  | 0.7543775 | 0.252656581 | -1.6489092   | 0.484483449 |
| 545887597 | PREDICTED: glucose-6-phosphate 1-dehydrogenase X-like isoform X1 [Sus scrofa]                        | 0.771575  | 0.257242212 | 0.4683    | 0.4683      | -1.647608371 | 0.550591044 |
| 284156668 | plasma membrane Ca2+-ATPase isoform 4xb [Bos taurus]                                                 | 1.99035   | 0.367210191 | 1.212775  | 0.453808675 | -1.641153553 | 0.283772312 |
| 114052937 | 3-hydroxyisobutyrate dehydrogenase, mitochondrial precursor [Bos taurus]                             | 2.013025  | 0.045698512 | 1.22874   | 0.474321155 | -1.638283933 | 0.185806354 |
| 126309291 | PREDICTED: mitochondrial 2-oxoglutarate/malate carrier protein [Monodelphis domestica]               | 1.245175  | 0.470836696 | 0.763065  | 0.254884778 | -1.631807251 | 0.518306661 |
| 255683404 | isocitrate dehydrogenase [NADP], mitochondrial [Sus scrofa]                                          | 5.206925  | 1.169421069 | 3.201125  | 0.544746723 | -1.626592214 | 0.257010539 |
| 545547690 | PREDICTED: sideroflexin-3 isoform X1 [Canis lupus familiaris]                                        | 2.01055   | 0.421055864 | 1.2426775 | 0.487193157 | -1.617917762 | 0.243460632 |
| 655862912 | PREDICTED: fibrillin-1 [Oryctolagus cuniculus]                                                       | 29.81475  | 12.44987049 | 18.47175  | 10.6884779  | -1.614072841 | 0.066145988 |
| 585187220 | PREDICTED: serpin H1 isoform X1 [Leptonychotes weddellii]                                            | 11.484975 | 1.412163712 | 7.13815   | 1.107834764 | -1.608956803 | 0.087063905 |
| 593735466 | PREDICTED: fibrillin-1-like [Physeter catodon]                                                       | 35.98725  | 15.1869706  | 22.37725  | 12.99154659 | -1.608206996 | 0.069876657 |
| 110331811 | COP9 complex subunit 7a [Bos taurus]                                                                 | 0.74888   | 0.25054158  | 0.4683    | 0.4683      | -1.599145847 | 0.722146909 |
| 343962597 | cytosolic non-specific dipeptidase [Sus scrofa]                                                      | 1.549375  | 0.671897232 | 0.96994   | 0.383071264 | -1.597392622 | 0.43624171  |
| 545802439 | PREDICTED: nidogen-2 [Sus scrofa]                                                                    | 9.238175  | 1.226801942 | 5.837325  | 2.251454489 | -1.582604189 | 0.190963744 |
| 159794954 | Chain A, Structure Of Full Length Grp94 With Amp-Pnp Bound                                           | 10.018525 | 1.279717349 | 6.379575  | 1.700233566 | -1.570406336 | 0.30329757  |
| 545869779 | PREDICTED: sushi domain-containing protein 2 [Sus scrofa]                                            | 1.968925  | 0.644454028 | 1.2586425 | 0.278335495 | -1.564324262 | 0.452746172 |
| 350580983 | PREDICTED: receptor expression-enhancing protein 5 [Sus scrofa]                                      | 4.54625   | 0.570810051 | 2.92234   | 1.239204197 | -1.55568825  | 0.33775244  |
| 350578417 | PREDICTED: CD109 antigen isoformX1 [Sus scrofa]                                                      | 0.765375  | 0.486800411 | 0.4955775 | 0.286987013 | -1.544410309 | 0.341969737 |
| 48976131  | fibrillin-1 precursor [Sus scrofa]                                                                   | 53.63     | 11.4266967  | 34.78075  | 10.50586383 | -1.541944898 | 0.102293382 |
| 47523464  | dolichyl-diphosphooligosaccharide--protein glycosyltransferase 48 kDa subunit precursor [Sus scrofa] | 3.001925  | 0.912549263 | 1.96715   | 0.361753541 | -1.526027502 | 0.189842154 |
| 395521751 | PREDICTED: aflatoxin B1 aldehyde reductase member 2-like [Sarcophilus harrisii]                      | 1.52048   | 0.30981711  | 0.9972175 | 0.026036997 | -1.52472254  | 0.164268007 |
| 504147195 | PREDICTED: tumor protein D54 [Ochotona princeps]                                                     | 1.518005  | 0.30559001  | 0.9998425 | 0.427784253 | -1.518244123 | 0.210424098 |
| 21730305  | Chain A, Crystal Structure Of Pig Phosphoglucose Isomerase                                           | 15.48825  | 2.453532908 | 10.220175 | 0.918438378 | -1.515458395 | 0.16336746  |
| 655884414 | PREDICTED: aconitate hydratase, mitochondrial [Oryctolagus cuniculus]                                | 7.90645   | 2.328599812 | 5.2408    | 1.383647987 | -1.508634178 | 0.244033665 |

|           |                                                                                                                                                 |          |             |           |             |              |             |
|-----------|-------------------------------------------------------------------------------------------------------------------------------------------------|----------|-------------|-----------|-------------|--------------|-------------|
| 114050997 | PRA1 family protein 2 [Bos taurus]                                                                                                              | 1.539425 | 0.657842919 | 1.021865  | 0.422961049 | -1.50648569  | 0.478776288 |
| 172072653 | lactadherin precursor [Sus scrofa]                                                                                                              | 42.047   | 3.425272666 | 28.00125  | 4.809285851 | -1.501611535 | 0.061125083 |
| 126310931 | PREDICTED: guanine nucleotide-binding protein G(k) subunit alpha [Monodelphis domestica]                                                        | 7.3107   | 1.098899855 | 4.8743    | 1.883068447 | -1.499846132 | 0.461689393 |
| 223872    | calmodulin                                                                                                                                      | 3.369875 | 2.381825983 | 2.257875  | 1.132381063 | -1.492498478 | 0.480047268 |
| 2392156   | Chain A, Refinement And Comparison Of The Crystal Structures Of Pig Cytosolic Aspartate Aminotransferase And Its Complex With 2-Methylaspartate | 6.288025 | 0.887146472 | 4.222975  | 0.166821933 | -1.489003605 | 0.076628192 |
| 178056860 | caveolin-2 [Sus scrofa]                                                                                                                         | 3.022    | 0.434286156 | 2.043725  | 0.845922297 | -1.478672522 | 0.101384505 |
| 358009193 | prolyl 4-hydroxylase beta polypeptide [Sus scrofa]                                                                                              | 19.397   | 2.969282152 | 13.1419   | 1.583372364 | -1.475966184 | 0.226457793 |
| 47523548  | glutaredoxin-1 [Sus scrofa]                                                                                                                     | 0.771575 | 0.257242212 | 0.52285   | 0.52285     | -1.475710051 | 0.655834607 |
| 47522680  | neutral alpha-glucosidase AB precursor [Sus scrofa]                                                                                             | 2.5056   | 0.265739368 | 1.699665  | 0.682442689 | -1.474172852 | 0.222411534 |
| 154425761 | FAH protein [Bos taurus]                                                                                                                        | 0.729925 | 0.454899845 | 0.4955775 | 0.286987013 | -1.472877602 | 0.768747872 |
| 545805668 | PREDICTED: LOW QUALITY PROTEIN: nucleosome assembly protein 1-like 4 [Sus scrofa]                                                               | 1.778105 | 0.279648381 | 1.212775  | 0.453808675 | -1.466145823 | 0.444821955 |
| 347582591 | cytoskeleton-associated protein 4 [Sus scrofa]                                                                                                  | 6.8309   | 0.954907606 | 4.675325  | 0.723264584 | -1.46105351  | 0.069109656 |
| 4507143   | sorting nexin-3 isoform a [Homo sapiens]                                                                                                        | 1.75915  | 0.251989287 | 1.206715  | 0.585047036 | -1.457800723 | 0.433243947 |
| 113205888 | aldehyde dehydrogenase, mitochondrial precursor [Sus scrofa]                                                                                    | 5.6019   | 1.288399404 | 3.91695   | 1.293181577 | -1.430168881 | 0.056634917 |
| 478510027 | PREDICTED: extended synaptotagmin-1 isoform 1 [Ceratotherium simum simum]                                                                       | 6.0226   | 0.54357822  | 4.211675  | 0.692266973 | -1.429977384 | 0.123765089 |
| 342349344 | protein Niban-like [Sus scrofa]                                                                                                                 | 4.28825  | 1.952386539 | 3.027     | 1.421145283 | -1.416666667 | 0.226421458 |
| 291389298 | PREDICTED: coatomer subunit zeta-1 [Oryctolagus cuniculus]                                                                                      | 1.02545  | 0.414620763 | 0.7271    | 0.4533045   | -1.410328703 | 0.658777445 |
| 134085902 | rho GTPase-activating protein 1 [Canis lupus familiaris]                                                                                        | 1.02545  | 0.414620763 | 0.729725  | 0.453906417 | -1.405255404 | 0.556722786 |
| 48675953  | rab GDP dissociation inhibitor beta [Sus scrofa]                                                                                                | 13.5266  | 1.503639505 | 9.6501    | 0.864387847 | -1.401705682 | 0.07609482  |
| 281353806 | hypothetical protein PANDA_017913 [Ailuropoda melanoleuca]                                                                                      | 1.034125 | 0.735652952 | 0.7384175 | 0.247188426 | -1.400461121 | 0.779669575 |
| 281338468 | hypothetical protein PANDA_002275 [Ailuropoda melanoleuca]                                                                                      | 4.3126   | 0.822716234 | 3.08415   | 1.347842199 | -1.398310718 | 0.525413753 |
| 304365440 | protein disulfide-isomerase A6 precursor [Sus scrofa]                                                                                           | 11.6906  | 1.764954625 | 8.375425  | 1.08108163  | -1.395821705 | 0.174062673 |
| 115497826 | Golgi-associated plant pathogenesis-related protein 1 [Bos taurus]                                                                              | 2.78085  | 0.507267473 | 1.994425  | 0.052079529 | -1.394311644 | 0.186706    |
| 301773598 | PREDICTED: LOW QUALITY PROTEIN: serine/threonine-protein kinase WNK4-like [Ailuropoda melanoleuca]                                              | 1.01273  | 0.425424122 | 0.7271    | 0.4533045   | -1.392834548 | 0.565376584 |
| 311272309 | PREDICTED: ADP/ATP translocase 1 isoform 2 [Sus scrofa]                                                                                         | 9.071125 | 0.908330103 | 6.51945   | 0.781017914 | -1.391394213 | 0.070693095 |
| 472381913 | PREDICTED: cytosol aminopeptidase [Odobenus rosmarus divergens]                                                                                 | 3.74085  | 0.57168406  | 2.696875  | 0.662856404 | -1.387105446 | 0.276631903 |
| 15431301  | 60S ribosomal protein L7 [Homo sapiens]                                                                                                         | 3.52485  | 0.667746846 | 2.5506    | 0.894868148 | -1.381968948 | 0.448410546 |
| 126131205 | progesterone receptor membrane component 2 [Sus scrofa]                                                                                         | 2.03573  | 0.439500937 | 1.4742    | 0.250836351 | -1.380904898 | 0.362304787 |
| 149640868 | PREDICTED: EGF-containing fibulin-like extracellular matrix protein 1 [Ornithorhynchus anatinus]                                                | 1.004055 | 0.42126092  | 0.7271    | 0.4533045   | -1.38090359  | 0.601226645 |
| 113205608 | 60S ribosomal protein L6 [Sus scrofa]                                                                                                           | 2.80385  | 1.917220735 | 2.033     | 0.936582491 | -1.379168716 | 0.670400232 |

|           |                                                                                                              |           |             |           |             |              |             |
|-----------|--------------------------------------------------------------------------------------------------------------|-----------|-------------|-----------|-------------|--------------|-------------|
| 311268489 | PREDICTED: fatty aldehyde dehydrogenase isoform X1 [Sus scrofa]                                              | 0.98755   | 0.38462955  | 0.7198275 | 0.463565445 | -1.371925913 | 0.378173608 |
| 149723798 | PREDICTED: ATP-citrate synthase isoformX1 [Equus caballus]                                                   | 3.757     | 0.936019527 | 2.74355   | 0.887189261 | -1.369393669 | 0.348024802 |
| 149642985 | alpha-parvin [Bos taurus]                                                                                    | 9.102825  | 1.802629588 | 6.664525  | 0.895888239 | -1.365862533 | 0.207311423 |
| 47523722  | hydroxyacyl-coenzyme A dehydrogenase, mitochondrial precursor [Sus scrofa]                                   | 5.7852    | 0.272266888 | 4.236325  | 0.766835718 | -1.365617605 | 0.071489812 |
| 149730823 | PREDICTED: 60 kDa heat shock protein, mitochondrial [Equus caballus]                                         | 14.7845   | 1.509893953 | 10.87875  | 1.224176794 | -1.359025623 | 0.182320414 |
| 504148889 | PREDICTED: myosin-11 isoform X2 [Ochotona princeps]                                                          | 411.165   | 33.35275913 | 302.7425  | 102.9036882 | -1.358134388 | 0.310995941 |
| 555989153 | PREDICTED: myosin-11-like, partial [Bos mutus]                                                               | 326.11    | 28.57932382 | 240.64    | 81.08109737 | -1.355177859 | 0.314296069 |
| 47523746  | dihydropteridine reductase [Sus scrofa]                                                                      | 3.017125  | 0.422087938 | 2.228575  | 0.196507703 | -1.353835971 | 0.064844498 |
| 55742742  | decorin precursor [Sus scrofa]                                                                               | 39.3584   | 10.31585058 | 29.135    | 4.924637905 | -1.350897546 | 0.414573314 |
| 346421386 | ATP synthase subunit g, mitochondrial [Sus scrofa]                                                           | 5.0388    | 0.459212638 | 3.730025  | 0.227161977 | -1.350875664 | 0.152236076 |
| 281346955 | hypothetical protein PANDA_001608 [Ailuropoda melanoleuca]                                                   | 2.013025  | 0.045698512 | 1.49279   | 0.286403496 | -1.348498449 | 0.149497727 |
| 281350720 | hypothetical protein PANDA_002799 [Ailuropoda melanoleuca]                                                   | 8.24785   | 0.964772127 | 6.151575  | 1.363082215 | -1.340770453 | 0.348158449 |
| 219521974 | copine-1 [Sus scrofa]                                                                                        | 3.28715   | 0.895517209 | 2.4601    | 0.601350429 | -1.336185521 | 0.073716604 |
| 545895236 | PREDICTED: vacuolar protein sorting-associated protein 35, partial [Sus scrofa]                              | 2.292055  | 0.51141417  | 1.715625  | 0.798022611 | -1.335988342 | 0.518727324 |
| 311260217 | PREDICTED: BAG family molecular chaperone regulator 2 isoform X1 [Sus scrofa]                                | 0.9838    | 0.384508229 | 0.7384175 | 0.247188426 | -1.332308619 | 0.631033022 |
| 585690381 | gj 585690381-DECOY                                                                                           | 1.01273   | 0.425424122 | 0.76044   | 0.493036547 | -1.33176845  | 0.402741576 |
| 178056732 | guanine nucleotide-binding protein G(i) subunit alpha-2 [Sus scrofa]                                         | 11.386975 | 1.512229177 | 8.553625  | 1.615784648 | -1.331245525 | 0.288724258 |
| 157428118 | programmed cell death protein 6 [Bos taurus]                                                                 | 5.273725  | 0.461286259 | 3.964175  | 0.330128648 | -1.330346163 | 0.16807527  |
| 545531227 | PREDICTED: LOW QUALITY PROTEIN: neuroblast differentiation-associated protein AHNAK [Canis lupus familiaris] | 31.3815   | 4.313939895 | 23.59825  | 2.132760511 | -1.329823186 | 0.053492617 |
| 507696166 | PREDICTED: integral membrane protein 2B-like [Echinops telfairi]                                             | 1.006505  | 0.022838214 | 0.7570025 | 0.496569994 | -1.329592703 | 0.645789549 |
| 47522764  | integrin beta-1 precursor [Sus scrofa]                                                                       | 36.688    | 4.262646674 | 27.66775  | 0.99726454  | -1.326020367 | 0.155336418 |
| 77736431  | ras-related protein Rab-5C [Bos taurus]                                                                      | 6.3029    | 0.557684369 | 4.765225  | 0.832048735 | -1.322686757 | 0.126649183 |
| 281338419 | hypothetical protein PANDA_002213 [Ailuropoda melanoleuca]                                                   | 3.55995   | 0.706283409 | 2.705575  | 0.398691356 | -1.315783151 | 0.292963937 |
| 297591959 | farnesyl pyrophosphate synthase precursor [Sus scrofa]                                                       | 1.262855  | 0.496499091 | 0.96125   | 0.66273479  | -1.313763329 | 0.795599411 |
| 545822151 | PREDICTED: 4-trimethylaminobutyraldehyde dehydrogenase [Sus scrofa]                                          | 3.2445    | 0.7291109   | 2.477475  | 0.631923106 | -1.309599491 | 0.541985267 |
| 344306519 | PREDICTED: myosin-11 [Loxodonta africana]                                                                    | 441.7825  | 41.03352925 | 337.4625  | 113.9211557 | -1.309130644 | 0.355796909 |
| 157279907 | parathymosin [Bos taurus]                                                                                    | 8.350075  | 0.985246293 | 6.388425  | 1.371325516 | -1.307063165 | 0.334332752 |
| 301757033 | PREDICTED: 40S ribosomal protein S10-like isoform 1 [Ailuropoda melanoleuca]                                 | 3.585105  | 1.014817463 | 2.746175  | 0.501940352 | -1.305490364 | 0.311123918 |
| 157831091 | Chain A, Atomic Structure Of Fkbp12, An Immunophilin Binding Protein                                         | 7.093425  | 0.845100347 | 5.481625  | 0.306983529 | -1.294036896 | 0.127449517 |
| 504150368 | PREDICTED: annexin A6 isoform X1 [Ochotona princeps]                                                         | 27.26825  | 6.783413231 | 21.0745   | 1.196573546 | -1.293897839 | 0.446971547 |

|           |                                                                                                          |          |             |           |             |              |             |
|-----------|----------------------------------------------------------------------------------------------------------|----------|-------------|-----------|-------------|--------------|-------------|
| 194221910 | PREDICTED: translationally-controlled tumor protein [Equus caballus]                                     | 0.9838   | 0.384508229 | 0.76044   | 0.493036547 | -1.293724686 | 0.670805317 |
| 90109258  | Chain A, Structure Of Calmodulin Bound To A Calcineurin Peptide: A New Way Of Making An Old Binding Mode | 7.389725 | 2.12033643  | 5.74245   | 1.410394471 | -1.286859267 | 0.188854332 |
| 194036227 | PREDICTED: selenium-binding protein 1 [Sus scrofa]                                                       | 4.532175 | 1.375649999 | 3.522575  | 1.255626926 | -1.286608518 | 0.253229016 |
| 126308210 | PREDICTED: importin subunit beta-1 [Monodelphis domestica]                                               | 3.818725 | 0.922915765 | 2.969015  | 1.136452575 | -1.286192559 | 0.434592888 |
| 488517430 | PREDICTED: adenylyl cyclase-associated protein 1 isoform 1 [Dasypus novemcinctus]                        | 13.65175 | 1.552568806 | 10.62155  | 1.050188149 | -1.285287929 | 0.192257436 |
| 194042189 | PREDICTED: annexin A11 isoform X1 [Sus scrofa]                                                           | 6.7514   | 1.025966667 | 5.25475   | 0.794020831 | -1.284818498 | 0.436706849 |
| 157074012 | EF-hand domain-containing protein D2 [Bos taurus]                                                        | 3.768425 | 0.241325373 | 2.94315   | 0.984443289 | -1.280405348 | 0.503506406 |
| 545884676 | PREDICTED: RNA binding motif (RNP1, RRM) protein 3 isoform X2 [Sus scrofa]                               | 5.036325 | 0.447751429 | 3.943     | 0.635752693 | -1.277282526 | 0.096377669 |
| 545803430 | PREDICTED: annexin A1 isoform X1 [Sus scrofa]                                                            | 42.4065  | 14.55719377 | 33.27175  | 11.27568706 | -1.274549731 | 0.090754502 |
| 118138612 | CD81 [Sus scrofa]                                                                                        | 3.7735   | 0.878846205 | 2.964375  | 0.34109145  | -1.27294961  | 0.257322884 |
| 562861819 | PREDICTED: fibromodulin [Tupaia chinensis]                                                               | 14.096   | 0.930436367 | 11.0783   | 1.869069597 | -1.272397389 | 0.16743862  |
| 543113    | smooth muscle protein SM22 homolog - bovine (fragments)                                                  | 340.115  | 30.10638872 | 267.6225  | 90.81072829 | -1.270875954 | 0.339347464 |
| 48675943  | amine oxidase [flavin-containing] A [Sus scrofa]                                                         | 2.809755 | 0.674483335 | 2.2112    | 0.958878571 | -1.270692384 | 0.497805534 |
| 194038270 | PREDICTED: fibulin-5 isoformX1 [Sus scrofa]                                                              | 9.249525 | 0.72096609  | 7.28425   | 1.792910865 | -1.269797852 | 0.452921438 |
| 350585077 | PREDICTED: uncharacterized protein LOC100739300 [Sus scrofa]                                             | 1.26413  | 0.266483331 | 0.9972175 | 0.026036997 | -1.267657256 | 0.419460284 |
| 671004321 | PREDICTED: 60S ribosomal protein L22 isoform X1 [Ursus maritimus]                                        | 2.54348  | 0.670350678 | 2.01039   | 0.438221025 | -1.265167455 | 0.480455973 |
| 114051892 | UDP-N-acetylhexosamine pyrophosphorylase [Bos taurus]                                                    | 1.26038  | 0.257869159 | 0.9972175 | 0.026036997 | -1.263896793 | 0.356654368 |
| 47522916  | glutathione S-transferase omega-1 [Sus scrofa]                                                           | 3.76465  | 0.631341176 | 2.98555   | 0.57279261  | -1.260956943 | 0.431948136 |
| 545184513 | PREDICTED: annexin A6 isoform X1 [Equus caballus]                                                        | 35.884   | 9.844227996 | 28.5245   | 1.348607955 | -1.258006275 | 0.494243173 |
| 593737926 | PREDICTED: adenylyl cyclase-associated protein 1 isoform X1 [Physeter catodon]                           | 8.081    | 0.722991917 | 6.435625  | 0.488448301 | -1.255666699 | 0.178612314 |
| 291383155 | PREDICTED: S-methyl-5'-thioadenosine phosphorylase [Oryctolagus cuniculus]                               | 1.518005 | 0.30559001  | 1.212775  | 0.453808675 | -1.251679001 | 0.662192658 |
| 431902724 | ADP/ATP translocase 3 [Pteropus alecto]                                                                  | 12.86985 | 1.597732619 | 10.302225 | 1.881533302 | -1.249230142 | 0.317927805 |
| 291393841 | PREDICTED: musculoskeletal embryonic nuclear protein 1 [Oryctolagus cuniculus]                           | 2.54103  | 0.895801147 | 2.0350425 | 0.751407858 | -1.248637313 | 0.736945541 |
| 146674796 | laminin receptor precursor [Oryctolagus cuniculus]                                                       | 5.56515  | 1.344358871 | 4.470475  | 0.844149992 | -1.244867715 | 0.285429436 |
| 296488587 | TPA: calcium channel, voltage-dependent, alpha 2/delta subunit 1 [Bos taurus]                            | 1.241425 | 0.212719461 | 0.9998425 | 0.427784253 | -1.241620555 | 0.65356975  |
| 545878421 | PREDICTED: annexin A6-like [Sus scrofa]                                                                  | 38.04    | 11.12689298 | 30.67275  | 2.40523822  | -1.240188767 | 0.499768779 |
| 327343034 | versican [Sus scrofa]                                                                                    | 4.302925 | 1.84010039  | 3.476475  | 1.295912266 | -1.237726433 | 0.478333944 |
| 311257410 | PREDICTED: heat shock protein beta-6 [Sus scrofa]                                                        | 5.8306   | 0.951029413 | 4.715925  | 0.408492981 | -1.236364022 | 0.144482594 |
| 545815606 | PREDICTED: asporin isoform X1 [Sus scrofa]                                                               | 22.2115  | 3.459335256 | 17.989    | 2.559373068 | -1.234726777 | 0.351739383 |
| 731514756 | PREDICTED: 60S ribosomal protein L8 [Loxodonta africana]                                                 | 1.26038  | 0.257869159 | 1.021865  | 0.422961049 | -1.233411458 | 0.659027211 |
| 528979844 | PREDICTED: alpha-enolase isoform X3 [Bos taurus]                                                         | 31.031   | 4.314268092 | 25.19225  | 2.368035838 | -1.231767706 | 0.067641133 |
| 164518958 | L-lactate dehydrogenase B chain [Sus scrofa]                                                             | 14.8275  | 0.832979842 | 12.04095  | 1.970627067 | -1.23142277  | 0.360367085 |

|           |                                                                                                                                                                                                                                                                      |          |             |           |             |              |             |
|-----------|----------------------------------------------------------------------------------------------------------------------------------------------------------------------------------------------------------------------------------------------------------------------|----------|-------------|-----------|-------------|--------------|-------------|
| 126302599 | RecName: Full=Protein S100-A10; AltName: Full=Calpactin I light chain; AltName: Full=Calpactin-1 light chain; AltName: Full=Cellular ligand of annexin II; AltName: Full=S100 calcium-binding protein A10; AltName: Full=p10 protein; AltName: Full=p11 [Sus scrofa] | 1.543175 | 0.51449313  | 1.2560175 | 0.272412578 | -1.228625397 | 0.597065538 |
| 602700845 | PREDICTED: LOW QUALITY PROTEIN: dicarbonyl/L-xylulose reductase [Lipotes vexillifer]                                                                                                                                                                                 | 1.521755 | 0.523685429 | 1.2400525 | 0.235500938 | -1.227169817 | 0.701070815 |
| 395545191 | PREDICTED: annexin A5 [Sarcophilus harrisi]                                                                                                                                                                                                                          | 16.65225 | 1.559841892 | 13.5795   | 1.318435721 | -1.226278582 | 0.116014441 |
| 22770997  | thioredoxin reductase [Sus scrofa]                                                                                                                                                                                                                                   | 1.507725 | 0.660919619 | 1.231365  | 0.214574573 | -1.22443386  | 0.735560948 |
| 591335618 | PREDICTED: annexin A6 isoform X1 [Panthera tigris altaica]                                                                                                                                                                                                           | 34.9115  | 8.917363189 | 28.51475  | 1.57800942  | -1.224331267 | 0.478112118 |
| 157954416 | cadherin-13 precursor [Equus caballus]                                                                                                                                                                                                                               | 1.237675 | 0.466545088 | 1.0131775 | 0.423395831 | -1.22157766  | 0.775930589 |
| 311258421 | PREDICTED: 6-phosphogluconate dehydrogenase, decarboxylating [Sus scrofa]                                                                                                                                                                                            | 1.779405 | 0.781191281 | 1.456825  | 0.801627728 | -1.221426733 | 0.247554694 |
| 545834105 | PREDICTED: basement membrane-specific heparan sulfate proteoglycan core protein [Sus scrofa]                                                                                                                                                                         | 62.70375 | 6.625930367 | 51.3585   | 12.65520162 | -1.220903064 | 0.584729897 |
| 156120603 | phosphatidylinositol-binding clathrin assembly protein [Bos taurus]                                                                                                                                                                                                  | 1.75425  | 0.877758545 | 1.43824   | 0.805013202 | -1.219719935 | 0.550789744 |
| 545833443 | PREDICTED: alpha-enolase isoform X1 [Sus scrofa]                                                                                                                                                                                                                     | 34.02675 | 5.219888415 | 27.9025   | 2.776656668 | -1.219487501 | 0.151990668 |
| 189571595 | plasminogen activator inhibitor 1 RNA-binding protein [Felis catus]                                                                                                                                                                                                  | 1.52423  | 0.315995655 | 1.24995   | 0.474778126 | -1.219432777 | 0.61394988  |
| 21070334  | ribosomal protein L7a, partial [Equus caballus]                                                                                                                                                                                                                      | 1.5407   | 0.662667047 | 1.2647    | 0.479258418 | -1.218233573 | 0.821283941 |
| 545204976 | PREDICTED: collagen alpha-1(XVIII) chain isoform X1 [Equus caballus]                                                                                                                                                                                                 | 4.048775 | 0.478114447 | 3.3235525 | 1.18946319  | -1.218207024 | 0.624313588 |
| 126352304 | elongation factor 1-alpha 1 [Equus caballus]                                                                                                                                                                                                                         | 27.91775 | 3.407284901 | 22.968    | 3.384888797 | -1.215506357 | 0.442729277 |
| 311273021 | PREDICTED: fibronectin isoformX2 [Sus scrofa]                                                                                                                                                                                                                        | 23.835   | 2.730666982 | 19.6285   | 5.731291892 | -1.214305729 | 0.270310187 |
| 731493073 | PREDICTED: ras-related protein Rab-1A isoform X1 [Loxodonta africana]                                                                                                                                                                                                | 10.84795 | 1.254217757 | 8.939     | 0.555047824 | -1.21355297  | 0.234607685 |
| 350586352 | PREDICTED: serpin peptidase inhibitor, clade B (ovalbumin), member 1 isoform X1 [Sus scrofa]                                                                                                                                                                         | 4.54245  | 0.700823813 | 3.743375  | 0.508904969 | -1.213463786 | 0.235018698 |
| 281344360 | hypothetical protein PANDA_004987 [Ailuropoda melanoleuca]                                                                                                                                                                                                           | 1.52048  | 0.30981711  | 1.2560175 | 0.272412578 | -1.210556382 | 0.353848941 |
| 115495993 | ras-related protein Rab-1B [Bos taurus]                                                                                                                                                                                                                              | 11.10555 | 1.170138155 | 9.18185   | 0.421808759 | -1.209511155 | 0.198134515 |
| 153792484 | peptidyl-prolyl cis-trans isomerase B [Equus caballus]                                                                                                                                                                                                               | 11.2724  | 1.635838315 | 9.3441    | 1.994401958 | -1.206365514 | 0.597177309 |
| 213972608 | ras-related protein Rab-6A [Rattus norvegicus]                                                                                                                                                                                                                       | 3.60405  | 1.229805801 | 2.991625  | 0.078099641 | -1.204713158 | 0.649041657 |
| 426254625 | PREDICTED: transforming growth factor beta-1-induced transcript 1 protein isoform 1 [Ovis aries]                                                                                                                                                                     | 6.569525 | 0.732492732 | 5.4596    | 0.938418858 | -1.203297861 | 0.21488821  |
| 16758368  | ras-related protein Rab-14 [Rattus norvegicus]                                                                                                                                                                                                                       | 6.875    | 1.412245207 | 5.715775  | 0.413041169 | -1.202811517 | 0.362175913 |
| 335309772 | PREDICTED: acyl-coenzyme A thioesterase 2, mitochondrial-like, partial [Sus scrofa]                                                                                                                                                                                  | 1.476375 | 0.447637378 | 1.231365  | 0.214574573 | -1.198974309 | 0.695834925 |
| 346986361 | electron-transfer-flavoprotein, alpha polypeptide [Sus scrofa]                                                                                                                                                                                                       | 3.813825 | 0.690208199 | 3.189825  | 0.850135217 | -1.195622017 | 0.340832216 |
| 335302965 | PREDICTED: lupus La protein homolog isoform X1 [Sus scrofa]                                                                                                                                                                                                          | 1.514255 | 0.511249894 | 1.267325  | 0.482633891 | -1.19484347  | 0.640784595 |
| 14043070  | heterogeneous nuclear ribonucleoprotein A1 isoform b [Homo sapiens]                                                                                                                                                                                                  | 3.543475 | 0.700971963 | 2.966975  | 0.346777345 | -1.194305648 | 0.569768461 |

|           |                                                                                                                                                       |           |             |           |             |              |             |
|-----------|-------------------------------------------------------------------------------------------------------------------------------------------------------|-----------|-------------|-----------|-------------|--------------|-------------|
| 504154327 | PREDICTED: transgelin-2 [ <i>Ochotona princeps</i> ]                                                                                                  | 25.27875  | 2.843072674 | 21.1675   | 2.542380823 | -1.194224637 | 0.208550173 |
| 641725986 | PREDICTED: cytoplasmic dynein 1 heavy chain 1 [ <i>Eptesicus fuscus</i> ]                                                                             | 20.9735   | 3.671036854 | 17.56675  | 3.692807093 | -1.193931718 | 0.587030187 |
| 311252243 | PREDICTED: macrophage-capping protein isoformX2 [ <i>Sus scrofa</i> ]                                                                                 | 10.019775 | 0.638930331 | 8.401375  | 1.355657548 | -1.192635134 | 0.474303413 |
| 311247250 | PREDICTED: barrier-to-autointegration factor-like isoformX1 [ <i>Sus scrofa</i> ]                                                                     | 3.279625  | 0.299872232 | 2.7514    | 0.513954192 | -1.191984081 | 0.488300872 |
| 126723018 | voltage-dependent anion-selective channel protein 1 [ <i>Oryctolagus cuniculus</i> ]                                                                  | 8.32845   | 1.348713311 | 6.996425  | 0.525597083 | -1.190386519 | 0.358354165 |
| 311266781 | PREDICTED: galactokinase isoform X1 [ <i>Sus scrofa</i> ]                                                                                             | 2.029505  | 0.600574037 | 1.705725  | 0.599835004 | -1.189819578 | 0.757599425 |
| 311254975 | PREDICTED: NADH-cytochrome b5 reductase 3-like isoform X1 [ <i>Sus scrofa</i> ]                                                                       | 14.91325  | 1.332566782 | 12.538775 | 1.260928897 | -1.189370572 | 0.200156128 |
| 505855867 | PREDICTED: N(G),N(G)-dimethylarginine dimethylaminohydrolase 2 [ <i>Sorex araneus</i> ]                                                               | 13.90805  | 1.832291771 | 11.69625  | 0.389147867 | -1.189103345 | 0.279579974 |
| 114689    | RecName: Full=ATP synthase-coupling factor 6, mitochondrial; Short=ATPase subunit F6 [ <i>Sus scrofa</i> ]                                            | 1.774355  | 0.496834648 | 1.49279   | 0.286403496 | -1.188616617 | 0.573588726 |
| 530668313 | putative cation-transporting ATPase 13A2 isoform 2 [ <i>Camelus ferus</i> ]                                                                           | 1.784305  | 0.513784861 | 1.5014775 | 0.299885513 | -1.188366126 | 0.743544712 |
| 312283580 | superoxide dismutase [Mn], mitochondrial [ <i>Sus scrofa</i> ]                                                                                        | 17.41775  | 2.881808529 | 14.69275  | 1.360848227 | -1.185465621 | 0.227723188 |
| 343478174 | T-complex protein 1 subunit alpha [ <i>Sus scrofa</i> ]                                                                                               | 1.784305  | 0.513784861 | 1.506125  | 0.656599068 | -1.184699145 | 0.3051032   |
| 584056604 | PREDICTED: LOW QUALITY PROTEIN: neuroblast differentiation-associated protein AHNAK [ <i>Myotis davidii</i> ]                                         | 30.0005   | 3.168081294 | 25.3445   | 2.734845684 | -1.183708497 | 0.057801799 |
| 505856264 | PREDICTED: neuroblast differentiation-associated protein AHNAK [ <i>Sorex araneus</i> ]                                                               | 17.64575  | 1.893072695 | 14.9289   | 2.590286987 | -1.181985947 | 0.174634577 |
| 617600724 | PREDICTED: basement membrane-specific heparan sulfate proteoglycan core protein [ <i>Erinaceus europaeus</i> ]                                        | 20.35875  | 2.159093536 | 17.230775 | 5.806827288 | -1.181534203 | 0.71339185  |
| 511901993 | PREDICTED: neuroblast differentiation-associated protein AHNAK [ <i>Mustela putorius furo</i> ]                                                       | 20.48825  | 3.155894416 | 17.3825   | 1.043363192 | -1.178671077 | 0.241518847 |
| 109110241 | PREDICTED: actin-related protein 2/3 complex subunit 5-like protein-like [ <i>Macaca mulatta</i> ]                                                    | 1.7554    | 0.245396186 | 1.490165  | 0.281379967 | -1.177990357 | 0.58143468  |
| 154757562 | SYNCRIP protein [ <i>Bos taurus</i> ]                                                                                                                 | 1.75915   | 0.251989287 | 1.4962275 | 0.667163524 | -1.175723612 | 0.639290834 |
| 194038586 | PREDICTED: transmembrane emp24 domain-containing protein 10 [ <i>Sus scrofa</i> ]                                                                     | 5.253475  | 0.99852019  | 4.4731    | 0.600232165 | -1.174459547 | 0.603456822 |
| 350587966 | PREDICTED: PDZ and LIM domain protein 5 isoformX3 [ <i>Sus scrofa</i> ]                                                                               | 5.805425  | 0.819899504 | 4.950075  | 0.602292625 | -1.172795362 | 0.086345087 |
| 10880989  | ras-related protein Rab-18 isoform 1 [ <i>Homo sapiens</i> ]                                                                                          | 2.03198   | 0.430648594 | 1.735625  | 0.237868656 | -1.17074829  | 0.576095035 |
| 440904790 | Annexin A6, partial [ <i>Bos mutus</i> ]                                                                                                              | 35.3525   | 9.466361291 | 30.2635   | 1.278272304 | -1.16815636  | 0.591966354 |
| 149636177 | PREDICTED: actin-related protein 2/3 complex subunit 5 [ <i>Ornithorhynchus anatinus</i> ]                                                            | 2.013025  | 0.045698512 | 1.724315  | 0.440218891 | -1.167434604 | 0.532588548 |
| 999617    | Chain A, Refined Structure Of Mitochondrial Malate Dehydrogenase From Porcine Heart And The Consensus Structure For Dicarboxylic Acid Oxidoreductases | 25.472    | 1.84719684  | 21.8555   | 1.610095313 | -1.165473222 | 0.153098556 |
| 149724885 | PREDICTED: proteasome subunit beta type-6 isoform X1 [ <i>Equus caballus</i> ]                                                                        | 2.013025  | 0.045698512 | 1.733     | 0.23271051  | -1.161583958 | 0.32917887  |
| 545210896 | PREDICTED: LOW QUALITY PROTEIN: ezrin [ <i>Equus caballus</i> ]                                                                                       | 8.2309    | 3.061077394 | 7.08665   | 2.446743859 | -1.161465573 | 0.829448341 |

|           |                                                                                                                              |           |             |           |             |              |             |
|-----------|------------------------------------------------------------------------------------------------------------------------------|-----------|-------------|-----------|-------------|--------------|-------------|
| 116734835 | ras-related protein Rab-2A [Bos taurus]                                                                                      | 2.251725  | 0.464107722 | 1.9425    | 0.637802136 | -1.159189189 | 0.494636811 |
| 335306783 | PREDICTED: rab GDP dissociation inhibitor alpha isoform 1 [Sus scrofa]                                                       | 11.507475 | 1.254662495 | 9.927475  | 0.919872108 | -1.159154266 | 0.410417609 |
| 149728225 | PREDICTED: ras-related protein Rab-7a [Equus caballus]                                                                       | 8.626525  | 1.380220672 | 7.446175  | 0.536719305 | -1.158517628 | 0.470918575 |
| 149633630 | PREDICTED: proteasome subunit alpha type-4 [Ornithorhynchus anatinus]                                                        | 1.77188   | 0.494633373 | 1.5307775 | 0.901102677 | -1.157503295 | 0.845743891 |
| 296472904 | TPA: ras-related C3 botulinum toxin substrate 1 precursor [Bos taurus]                                                       | 1.9941    | 0.370857468 | 1.724315  | 0.440218891 | -1.156459232 | 0.659725704 |
| 113205874 | ATP synthase subunit O, mitochondrial precursor [Sus scrofa]                                                                 | 6.32055   | 0.847729361 | 5.472925  | 0.607163225 | -1.154876049 | 0.428793679 |
| 426232103 | PREDICTED: annexin A5 [Ovis aries]                                                                                           | 44.821    | 5.657344342 | 38.898    | 3.34266311  | -1.15227004  | 0.330048421 |
| 350276172 | leucine-rich repeat-containing protein 59 [Sus scrofa]                                                                       | 2.016775  | 0.426276881 | 1.75159   | 0.264678814 | -1.151396731 | 0.642268063 |
| 148237282 | 60S ribosomal protein L14 [Sus scrofa]                                                                                       | 2.054675  | 0.723480567 | 1.784925  | 0.648649853 | -1.151126798 | 0.824912129 |
| 242247459 | ADP-ribosylation factor 3 [Ovis aries]                                                                                       | 8.7908    | 1.029774279 | 7.644275  | 1.368185374 | -1.149984793 | 0.561456455 |
| 335293906 | PREDICTED: annexin A5 [Sus scrofa]                                                                                           | 60.41675  | 6.827392101 | 52.5405   | 4.137811851 | -1.149908166 | 0.288460397 |
| 602681137 | PREDICTED: alpha-enolase isoform X1 [Lipotes vexillifer]                                                                     | 33.29575  | 4.63001266  | 28.957    | 2.092199202 | -1.149834237 | 0.211755742 |
| 162952052 | transketolase [Sus scrofa]                                                                                                   | 8.598725  | 1.938131341 | 7.49245   | 1.534712017 | -1.14765197  | 0.602870314 |
| 47523308  | heat shock 70 kDa protein 1B [Sus scrofa]                                                                                    | 22.63725  | 2.829066141 | 19.73075  | 1.527812563 | -1.147308136 | 0.492521939 |
| 149243025 | Chain B, Crystal Structure Of Bovine Arp23 COMPLEX CO-Crystallized With Atp And Crosslinked With Glutaraldehyde              | 2.806005  | 0.788056688 | 2.44879   | 1.15592546  | -1.145874085 | 0.812545983 |
| 194220990 | PREDICTED: 40S ribosomal protein S7 [Equus caballus]                                                                         | 4.55895   | 0.706137947 | 3.9862    | 0.428605234 | -1.143683207 | 0.549420249 |
| 335290008 | PREDICTED: ras-related protein R-Ras [Sus scrofa]                                                                            | 6.007725  | 0.644001473 | 5.253525  | 0.541551388 | -1.143560752 | 0.504894879 |
| 545858631 | PREDICTED: integrin alpha-3 isoform X2 [Sus scrofa]                                                                          | 6.232375  | 0.787990863 | 5.479     | 0.28951373  | -1.137502281 | 0.487641237 |
| 1943418   | Chain A, Structure Of Porcine Class Pi Glutathione S-Transferase                                                             | 16.314    | 0.273635098 | 14.36875  | 1.411642623 | -1.1353806   | 0.200787588 |
| 586540023 | PREDICTED: integrin alpha-3 isoform X1 [Pteropus alecto]                                                                     | 4.774925  | 0.242478292 | 4.207025  | 0.393963671 | -1.134988501 | 0.410024298 |
| 264681432 | annexin A4 [Sus scrofa]                                                                                                      | 22.183    | 3.933064009 | 19.55525  | 1.70141732  | -1.134375679 | 0.468396688 |
| 594104235 | PREDICTED: myosin light polypeptide 6 isoform X2 [Bubalus bubalis]                                                           | 77.29325  | 6.303694596 | 68.233    | 4.927540073 | -1.13278399  | 0.46467675  |
| 591326005 | PREDICTED: serine/threonine-protein phosphatase PP1-beta catalytic subunit [Panthera tigris altaica]                         | 7.8901    | 1.453529685 | 6.969175  | 0.561391773 | -1.132142614 | 0.424763401 |
| 545802444 | PREDICTED: fermitin family homolog 2, partial [Sus scrofa]                                                                   | 18.916    | 2.127934249 | 16.7564   | 2.525696721 | -1.128882099 | 0.370481388 |
| 115304856 | ARP3 actin-related protein 3 homolog (yeast) [Bos taurus]                                                                    | 7.55055   | 0.907522617 | 6.6918    | 0.508468388 | -1.128328701 | 0.164120212 |
| 349732194 | armadillo repeat containing 10 [Sus scrofa]                                                                                  | 3.068705  | 1.129586937 | 2.721525  | 0.428321167 | -1.127568183 | 0.668504137 |
| 560949121 | PREDICTED: basement membrane-specific heparan sulfate proteoglycan core protein [Vicugna pacos]                              | 44.06     | 6.217470185 | 39.0955   | 9.404167281 | -1.126983924 | 0.760242864 |
| 338709914 | PREDICTED: serine/threonine-protein phosphatase 2A 65 kDa regulatory subunit A alpha isoform-like isoform 1 [Equus caballus] | 5.011175  | 0.531500601 | 4.4519    | 0.928777973 | -1.125626137 | 0.587353944 |
| 346716222 | histidine triad nucleotide-binding protein 2, mitochondrial isoform 1 precursor [Sus scrofa]                                 | 2.78085   | 0.507267473 | 2.471425  | 0.226513217 | -1.125201048 | 0.696698187 |
| 466023053 | PREDICTED: basement membrane-specific heparan sulfate proteoglycan core protein [Orcinus orca]                               | 37.8465   | 4.851946079 | 33.63825  | 9.204221109 | -1.125103119 | 0.769080254 |
| 311253953 | PREDICTED: myelin protein P0 [Sus scrofa]                                                                                    | 6.48625   | 0.699930423 | 5.7865025 | 1.863403395 | -1.120927538 | 0.625764461 |
| 335306431 | PREDICTED: plastin-3 isoformX1 [Sus scrofa]                                                                                  | 14.7305   | 1.542793219 | 13.1515   | 1.068186742 | -1.12006235  | 0.444717897 |



|           |                                                                                                                                                                                                                                               |           |             |           |             |              |             |
|-----------|-----------------------------------------------------------------------------------------------------------------------------------------------------------------------------------------------------------------------------------------------|-----------|-------------|-----------|-------------|--------------|-------------|
| 512011889 | PREDICTED: neuroblast differentiation-associated protein AHNAK [Mustela putorius furo]                                                                                                                                                        | 26.722    | 3.43361816  | 23.8585   | 1.274346793 | -1.120020119 | 0.318463806 |
| 620979001 | PREDICTED: vesicle-associated membrane protein 2 [Ornithorhynchus anatinus]                                                                                                                                                                   | 2.7846    | 0.302121832 | 2.487375  | 0.279825405 | -1.119493442 | 0.289147949 |
| 77735497  | actin-related protein 2/3 complex subunit 3 [Bos taurus]                                                                                                                                                                                      | 5.5251    | 0.250144255 | 4.957375  | 1.214130377 | -1.114521294 | 0.655745917 |
| 281427374 | T-complex protein 1 subunit beta [Sus scrofa]                                                                                                                                                                                                 | 8.57595   | 0.76917748  | 7.729625  | 0.909055137 | -1.109491081 | 0.098073633 |
| 560910590 | PREDICTED: fructose-bisphosphate aldolase A isoform X1 [Camelus ferus]                                                                                                                                                                        | 23.21675  | 2.357071431 | 20.94525  | 1.355244343 | -1.10844941  | 0.366209047 |
| 410948265 | PREDICTED: stress-70 protein, mitochondrial [Felis catus]                                                                                                                                                                                     | 8.803375  | 0.665753145 | 7.945175  | 1.058247385 | -1.108015242 | 0.489185811 |
| 143811426 | RecName: Full=Neurofilament light polypeptide; Short=NF-L; AltName: Full=68 kDa neurofilament protein; AltName: Full=Neurofilament triplet L protein [Sus scrofa]                                                                             | 1.87945   | 1.87945     | 1.699875  | 1.699875    | -1.105640121 | 0.391002219 |
| 545799434 | PREDICTED: collagen alpha-1(XII) chain [Sus scrofa]                                                                                                                                                                                           | 8.565225  | 3.732980296 | 7.7482    | 0.94495428  | -1.105447072 | 0.86527439  |
| 431895484 | Alpha-centractin [Pteropus alecto]                                                                                                                                                                                                            | 3.273425  | 0.271492935 | 2.964375  | 0.34109145  | -1.104254691 | 0.627075641 |
| 28395033  | rho-related GTP-binding protein RhoC precursor [Homo sapiens]                                                                                                                                                                                 | 5.76005   | 0.368109419 | 5.22485   | 1.011797057 | -1.102433563 | 0.686818778 |
| 112980819 | mitochondrial succinate dehydrogenase complex subunit A [Sus scrofa]                                                                                                                                                                          | 3.0068    | 0.699462558 | 2.7276    | 0.636884405 | -1.10236105  | 0.258090622 |
| 297591975 | ATP synthase subunit alpha, mitochondrial [Sus scrofa]                                                                                                                                                                                        | 30.6055   | 1.535635835 | 27.81175  | 1.319570408 | -1.100452147 | 0.153177958 |
| 554570166 | PREDICTED: 14-3-3 protein zeta/delta [Myotis brandtii]                                                                                                                                                                                        | 26.96975  | 1.310907915 | 24.5185   | 1.713250541 | -1.099975529 | 0.328273634 |
| 253706    | 14-3-3 protein zeta chain [cattle, brain, Peptide, 245 aa]                                                                                                                                                                                    | 27.22975  | 1.469812764 | 24.78575  | 1.323308315 | -1.098605045 | 0.341554376 |
| 47523870  | peroxiredoxin-6 [Sus scrofa]                                                                                                                                                                                                                  | 11.13345  | 1.459503775 | 10.1417   | 0.979137268 | -1.097789325 | 0.650866097 |
| 335300581 | PREDICTED: T-complex protein 1 subunit theta isoform 1 [Sus scrofa]                                                                                                                                                                           | 3.79735   | 0.547565352 | 3.466     | 0.465421021 | -1.095600115 | 0.547043947 |
| 281352800 | hypothetical protein PANDA_015972 [Ailuropoda melanoleuca]                                                                                                                                                                                    | 4.026075  | 0.091369072 | 3.6781    | 0.746652755 | -1.09460727  | 0.679662553 |
| 47523806  | four and a half LIM domains 1 protein, isoform C [Sus scrofa]                                                                                                                                                                                 | 12.703025 | 2.449252964 | 11.61115  | 1.446306925 | -1.094036766 | 0.496633493 |
| 297307137 | ran-specific GTPase-activating protein [Sus scrofa]                                                                                                                                                                                           | 0.7778    | 0.497606888 | 0.71114   | 0.449957229 | -1.093736817 | 0.930636518 |
| 335288532 | PREDICTED: ubiquitin carboxyl-terminal hydrolase 5 isoform 1 [Sus scrofa]                                                                                                                                                                     | 0.5115    | 0.295330535 | 0.4683    | 0.4683      | -1.092248559 | 0.916695964 |
| 291399010 | PREDICTED: peroxiredoxin-1 [Oryctolagus cuniculus]                                                                                                                                                                                            | 10.61445  | 1.184793499 | 9.722625  | 1.664877478 | -1.091726771 | 0.625025575 |
| 129077    | RecName: Full=Mimecan; AltName: Full=Osteoglycin; Contains: RecName: Full=Corneal keratan sulfate proteoglycan 25 core protein; Short=KSPG25 protein; Contains: RecName: Full=Osteoinductive factor; Short=OIF; Flags: Precursor [Bos taurus] | 12.602925 | 3.311465211 | 11.547525 | 2.995020168 | -1.091396208 | 0.704597335 |
| 444721919 | Annexin A5 [Tupaia chinensis]                                                                                                                                                                                                                 | 34.3385   | 4.392873291 | 31.46975  | 3.073403119 | -1.09115897  | 0.668391307 |
| 545865248 | PREDICTED: lipoma-preferred partner [Sus scrofa]                                                                                                                                                                                              | 4.318825  | 1.105182554 | 3.974925  | 0.920838033 | -1.086517356 | 0.438931126 |
| 329664500 | pyruvate kinase PKM [Bos taurus]                                                                                                                                                                                                              | 41.747    | 2.332906663 | 38.48775  | 2.554871894 | -1.084682789 | 0.200318345 |
| 115503718 | RecName: Full=Caveolin-1 [Rhinolophus ferrumequinum]                                                                                                                                                                                          | 5.992375  | 1.313140292 | 5.527075  | 1.521508476 | -1.084185577 | 0.624502275 |
| 149709439 | PREDICTED: dnaJ homolog subfamily B member 4 isoform X1 [Equus caballus]                                                                                                                                                                      | 0.769125  | 0.492675365 | 0.71114   | 0.449957229 | -1.081538094 | 0.895967902 |

|           |                                                                                                                                                                                                                 |          |             |           |             |              |             |
|-----------|-----------------------------------------------------------------------------------------------------------------------------------------------------------------------------------------------------------------|----------|-------------|-----------|-------------|--------------|-------------|
| 124231    | RecName: Full=Eukaryotic translation initiation factor 5A-1; Short=eIF-5A-1; Short=eIF-5A1; AltName: Full=Eukaryotic initiation factor 5A isoform 1; Short=eIF-5A; AltName: Full=eIF-4D [Oryctolagus cuniculus] | 4.252325 | 0.730659539 | 3.9456    | 0.477273346 | -1.077738494 | 0.657162971 |
| 149621306 | PREDICTED: 40S ribosomal protein S25 [Ornithorhynchus anatinus]                                                                                                                                                 | 3.302325 | 0.540064123 | 3.065575  | 1.268882478 | -1.077228579 | 0.872469409 |
| 284004958 | 14-3-3 protein eta [Oryctolagus cuniculus]                                                                                                                                                                      | 9.3125   | 0.34698797  | 8.6517    | 0.93249808  | -1.076378053 | 0.639626178 |
| 440909750 | GTP-binding nuclear protein Ran, partial [Bos mutus]                                                                                                                                                            | 5.290175 | 0.316279777 | 4.915525  | 0.779313672 | -1.076217698 | 0.625781682 |
| 298104076 | enoyl-CoA hydratase, mitochondrial [Sus scrofa]                                                                                                                                                                 | 4.8001   | 0.555259124 | 4.465825  | 0.179310589 | -1.074851791 | 0.675676155 |
| 194038728 | PREDICTED: poly [ADP-ribose] polymerase 6 isoformX1 [Sus scrofa]                                                                                                                                                | 78.8525  | 5.559857919 | 73.535    | 4.335161608 | -1.072312504 | 0.142445178 |
| 281350286 | hypothetical protein PANDA_006098 [Ailuropoda melanoleuca]                                                                                                                                                      | 9.53835  | 0.810240225 | 8.903025  | 1.218434581 | -1.071360577 | 0.616516687 |
| 545860373 | PREDICTED: myosin-10, partial [Sus scrofa]                                                                                                                                                                      | 131.5275 | 10.48401035 | 122.775   | 8.552002202 | -1.071288943 | 0.515237189 |
| 115496488 | vesicle-trafficking protein SEC22b precursor [Bos taurus]                                                                                                                                                       | 1.0292   | 0.420730989 | 0.96125   | 0.66273479  | -1.070689207 | 0.863126164 |
| 347300176 | peroxiredoxin-2 [Sus scrofa]                                                                                                                                                                                    | 19.12525 | 0.857227739 | 17.919    | 0.83041867  | -1.067316815 | 0.308175688 |
| 281351805 | hypothetical protein PANDA_010030 [Ailuropoda melanoleuca]                                                                                                                                                      | 5.7725   | 0.936667664 | 5.424475  | 0.933278941 | -1.064158283 | 0.638223917 |
| 281342576 | hypothetical protein PANDA_020401 [Ailuropoda melanoleuca]                                                                                                                                                      | 12.32615 | 1.917343246 | 11.5866   | 1.773281303 | -1.063828043 | 0.32116651  |
| 47523764  | peptidyl-prolyl cis-trans isomerase A [Sus scrofa]                                                                                                                                                              | 47.32375 | 2.983907711 | 44.6705   | 2.458892993 | -1.059396022 | 0.612418637 |
| 194218821 | PREDICTED: protein canopy homolog 4 [Equus caballus]                                                                                                                                                            | 0.771575 | 0.257242212 | 0.729725  | 0.453906417 | -1.057350372 | 0.920470443 |
| 116175251 | macrophage migration inhibitory factor [Sus scrofa]                                                                                                                                                             | 12.1135  | 1.10487175  | 11.479525 | 0.745783945 | -1.055226588 | 0.697340924 |
| 545853401 | PREDICTED: vimentin isoform X1 [Sus scrofa]                                                                                                                                                                     | 384.66   | 18.8224011  | 365.59    | 23.13139749 | -1.052162258 | 0.171569586 |
| 194206522 | PREDICTED: acidic leucine-rich nuclear phosphoprotein 32 family member A isoform X1 [Equus caballus]                                                                                                            | 0.492555 | 0.284979855 | 0.4683    | 0.4683      | -1.051793722 | 0.951078813 |
| 113205886 | nucleoside diphosphate kinase B [Sus scrofa]                                                                                                                                                                    | 8.84505  | 0.896445779 | 8.412575  | 0.998034687 | -1.05140816  | 0.767507612 |
| 344281491 | PREDICTED: dihydropyrimidinase-related protein 2 isoform X2 [Loxodonta africana]                                                                                                                                | 11.966   | 1.901592164 | 11.383025 | 0.978228229 | -1.051214418 | 0.759338806 |
| 440907381 | Cofilin-1, partial [Bos mutus]                                                                                                                                                                                  | 23.26025 | 2.407803196 | 22.19125  | 4.155642938 | -1.04817214  | 0.777088432 |
| 27806689  | clathrin heavy chain 1 [Bos taurus]                                                                                                                                                                             | 24.925   | 1.541399364 | 23.78375  | 2.764160854 | -1.047984443 | 0.516480751 |
| 298677090 | superoxide dismutase [Cu-Zn] [Sus scrofa]                                                                                                                                                                       | 10.62725 | 1.818888071 | 10.1411   | 1.037453859 | -1.047938587 | 0.815802279 |
| 157428070 | erythrocyte band 7 integral membrane protein [Bos taurus]                                                                                                                                                       | 7.074475 | 0.704268342 | 6.752375  | 0.810698179 | -1.047701735 | 0.803385053 |
| 281341352 | hypothetical protein PANDA_012739 [Ailuropoda melanoleuca]                                                                                                                                                      | 1.26413  | 0.266483331 | 1.206715  | 0.585047036 | -1.047579586 | 0.886152766 |
| 148887343 | RecName: Full=ATP synthase subunit e, mitochondrial; Short=ATPase subunit e [Sus scrofa]                                                                                                                        | 6.521675 | 0.607422133 | 6.2261    | 0.241377267 | -1.047473539 | 0.6609292   |
| 488544468 | PREDICTED: pyruvate kinase isozymes M1/M2 isoform 2 [Dasypus novemcinctus]                                                                                                                                      | 44.54275 | 3.604126255 | 42.54575  | 3.422490184 | -1.046937708 | 0.63949077  |
| 149751396 | PREDICTED: T-complex protein 1 subunit gamma isoform 1 [Equus caballus]                                                                                                                                         | 1.53043  | 0.677161461 | 1.46289   | 0.616771422 | -1.046168885 | 0.866973354 |
| 13385408  | 60S ribosomal protein L11 [Mus musculus]                                                                                                                                                                        | 1.80325  | 0.652334318 | 1.724315  | 0.440218891 | -1.045777599 | 0.893870769 |
| 545859794 | PREDICTED: myb-binding protein 1A isoform X1 [Sus scrofa]                                                                                                                                                       | 0.767825 | 0.487251147 | 0.7357925 | 0.2461123   | -1.043534692 | 0.966551466 |

|           |                                                                                              |          |             |           |             |              |             |
|-----------|----------------------------------------------------------------------------------------------|----------|-------------|-----------|-------------|--------------|-------------|
| 593763768 | PREDICTED: peptidyl-prolyl cis-trans isomerase A-like [Physeter catodon]                     | 39.798   | 1.926682425 | 38.22775  | 1.784565417 | -1.041076182 | 0.638995453 |
| 126303044 | PREDICTED: ras-related protein Rab-10 [Monodelphis domestica]                                | 8.823675 | 0.437710782 | 8.476725  | 0.700804323 | -1.040929722 | 0.707554362 |
| 229506    | aldolase C                                                                                   | 12.1045  | 0.891411474 | 11.63365  | 1.221566285 | -1.04047311  | 0.742859698 |
| 28461233  | tubulin-specific chaperone A [Bos taurus]                                                    | 0.765375 | 0.486800411 | 0.7357925 | 0.2461123   | -1.040204949 | 0.969623824 |
| 335284210 | PREDICTED: heat shock protein beta-1-like isoform 1 [Sus scrofa]                             | 37.3635  | 2.919394015 | 36.0625   | 1.782036873 | -1.036076256 | 0.703369425 |
| 350578838 | PREDICTED: synemin [Sus scrofa]                                                              | 1.52668  | 0.531811205 | 1.4742    | 0.250836351 | -1.035598969 | 0.945763145 |
| 585697890 | PREDICTED: heterogeneous nuclear ribonucleoprotein L-like [Elephantulus edwardii]            | 2.01055  | 0.421055864 | 1.9425    | 0.637802136 | -1.035032175 | 0.854062683 |
| 488520727 | PREDICTED: transgelin [Dasypus novemcinctus]                                                 | 301.895  | 26.23473223 | 291.6825  | 24.23206463 | -1.035012385 | 0.669083906 |
| 335292694 | PREDICTED: heat shock-related 70 kDa protein 2 [Sus scrofa]                                  | 22.8735  | 1.718820453 | 22.106    | 1.128577645 | -1.034719081 | 0.695449464 |
| 109131908 | PREDICTED: small nuclear ribonucleoprotein Sm D2-like [Macaca mulatta]                       | 1.031675 | 0.424761675 | 0.9972175 | 0.026036997 | -1.034553646 | 0.938684944 |
| 298104130 | acylphosphatase-1 isoform 1 [Sus scrofa]                                                     | 2.060875 | 0.732242628 | 1.994425  | 0.052079529 | -1.033317874 | 0.932963789 |
| 545840440 | PREDICTED: LOW QUALITY PROTEIN: IQ motif containing GTPase activating protein 1 [Sus scrofa] | 14.6655  | 1.600583461 | 14.203125 | 2.891620684 | -1.032554455 | 0.773900075 |
| 126345443 | PREDICTED: poly(rC)-binding protein 2-like isoform X1 [Monodelphis domestica]                | 1.5407   | 0.662667047 | 1.49279   | 0.286403496 | -1.032094266 | 0.92180872  |
| 301779207 | PREDICTED: integrin-linked protein kinase-like [Ailuropoda melanoleuca]                      | 2.832475 | 0.978844125 | 2.746175  | 0.501940352 | -1.031425528 | 0.913259084 |
| 432092845 | Translational activator GCN1 [Myotis davidii]                                                | 9.145625 | 1.612784673 | 8.88705   | 1.113779168 | -1.029095707 | 0.848024234 |
| 281353009 | hypothetical protein PANDA_006420 [Ailuropoda melanoleuca]                                   | 1.26413  | 0.266483331 | 1.22874   | 0.474321155 | -1.028801862 | 0.938255035 |
| 130490906 | voltage-dependent anion-selective channel protein 2 [Oryctolagus cuniculus]                  | 10.26505 | 0.888265863 | 9.990575  | 0.603009309 | -1.027473394 | 0.790414175 |
| 126282483 | PREDICTED: proteasome subunit alpha type-3 [Monodelphis domestica]                           | 1.26413  | 0.266483331 | 1.231365  | 0.214574573 | -1.026608682 | 0.57592442  |
| 634882188 | PREDICTED: mimecan [Orycteropus afer afer]                                                   | 13.4109  | 3.425828519 | 13.0673   | 2.901392486 | -1.026294644 | 0.923011558 |
| 586489477 | PREDICTED: calponin-1 [Chrysochloris asiatica]                                               | 154.2825 | 18.7091343  | 150.4475  | 9.184022698 | -1.02549062  | 0.781386303 |
| 593739773 | PREDICTED: carbonyl reductase [NADPH] 1 [Physeter catodon]                                   | 2.520775 | 0.515735353 | 2.4601    | 0.601350429 | -1.024663632 | 0.957143961 |
| 114051331 | obg-like ATPase 1 [Bos taurus]                                                               | 1.734    | 0.436085808 | 1.6924    | 0.708494431 | -1.024580477 | 0.917659381 |
| 147903595 | F-actin-capping protein subunit alpha-2 [Sus scrofa]                                         | 4.32775  | 0.816516186 | 4.23895   | 0.485938498 | -1.020948584 | 0.844063067 |
| 560963606 | PREDICTED: LOW QUALITY PROTEIN: collagen alpha-1(XV) chain [Vicugna pacos]                   | 3.068705 | 1.129586937 | 3.007575  | 0.454057949 | -1.020325345 | 0.959334485 |
| 395516598 | PREDICTED: actin-related protein 2/3 complex subunit 4 [Sarcophilus harrisii]                | 8.5801   | 0.963841224 | 8.416175  | 0.883941371 | -1.019477375 | 0.908160292 |
| 335298275 | PREDICTED: glyoxalase domain-containing protein 4 [Sus scrofa]                               | 1.75915  | 0.251989287 | 1.72694   | 0.442984409 | -1.018651488 | 0.956992512 |
| 350583750 | PREDICTED: hsc70-interacting protein isoform 1 [Sus scrofa]                                  | 1.006505 | 0.022838214 | 0.988525  | 0.383544768 | -1.018188716 | 0.963741837 |
| 349501107 | ribosomal protein, large, P2 [Sus scrofa]                                                    | 6.2892   | 0.650889283 | 6.181475  | 0.801956763 | -1.01742707  | 0.938272005 |

|           |                                                                                                                                                                                           |          |             |           |             |              |             |
|-----------|-------------------------------------------------------------------------------------------------------------------------------------------------------------------------------------------|----------|-------------|-----------|-------------|--------------|-------------|
| 345792633 | PREDICTED: phosphoglycerate mutase 1 isoform 4 [Canis lupus familiaris]                                                                                                                   | 8.330075 | 1.050608637 | 8.193275  | 0.306577993 | -1.01669662  | 0.909452389 |
| 190360743 | charged multivesicular body protein 4b [Bos taurus]                                                                                                                                       | 1.26038  | 0.257869159 | 1.2400525 | 0.235500938 | -1.016392451 | 0.963270496 |
| 350583566 | PREDICTED: serine--tRNA ligase, cytoplasmic [Sus scrofa]                                                                                                                                  | 1.514255 | 0.511249894 | 1.490165  | 0.281379967 | -1.016165995 | 0.97447564  |
| 586458037 | PREDICTED: 14-3-3 protein gamma [Chrysochloris asiatica]                                                                                                                                  | 13.616   | 1.476003218 | 13.405    | 0.565725788 | -1.015740395 | 0.849944079 |
| 335281609 | PREDICTED: stress-induced-phosphoprotein 1 [Sus scrofa]                                                                                                                                   | 0.9851   | 0.569954481 | 0.96994   | 0.383071264 | -1.015629833 | 0.972224381 |
| 14249144  | ras-related protein Rab-11B [Rattus norvegicus]                                                                                                                                           | 3.582655 | 1.094292459 | 3.5278    | 0.71725886  | -1.015549351 | 0.963578787 |
| 350589409 | PREDICTED: protein phosphatase 1 regulatory subunit 12B-like isoform X1 [Sus scrofa]                                                                                                      | 5.0288   | 0.417662701 | 4.9614    | 0.314754105 | -1.013584875 | 0.915710816 |
| 223950631 | guanine nucleotide-binding protein G(I)/G(S)/G(O) subunit gamma-12 [Sus scrofa]                                                                                                           | 4.330225 | 0.924797876 | 4.272275  | 0.710396558 | -1.013564202 | 0.942349406 |
| 47523106  | calponin-1 [Sus scrofa]                                                                                                                                                                   | 170.96   | 19.97253239 | 168.97    | 7.270521531 | -1.011777239 | 0.908010134 |
| 262263205 | triosephosphate isomerase 1 [Sus scrofa]                                                                                                                                                  | 33.11025 | 3.886751115 | 32.8385   | 0.966145736 | -1.008275348 | 0.933895635 |
| 444729185 | Myosin regulatory light polypeptide 9 [Tupaia chinensis]                                                                                                                                  | 40.485   | 6.164606678 | 40.20525  | 2.324142902 | -1.006958047 | 0.960768187 |
| 217038350 | ribosomal protein L17 (predicted) [Oryctolagus cuniculus]                                                                                                                                 | 0.50775  | 0.50775     | 0.504265  | 0.291532728 | -1.006911049 | 0.993585989 |
| 545800035 | PREDICTED: tropomyosin alpha-1 chain isoform X2 [Sus scrofa]                                                                                                                              | 153.7025 | 8.311183605 | 152.8775  | 3.155805167 | -1.005396478 | 0.941642608 |
| 47523046  | acyl-CoA-binding protein [Sus scrofa]                                                                                                                                                     | 2.745425 | 0.735028595 | 2.732825  | 0.231111461 | -1.004610614 | 0.989576269 |
| 528766928 | tropomyosin 3, gamma isoform 19-like protein [Camelus ferus]                                                                                                                              | 69.4605  | 4.226390452 | 69.151    | 0.675619099 | -1.004475713 | 0.948874313 |
| 634836482 | PREDICTED: gelsolin isoform X5 [Orycteropus afer afer]                                                                                                                                    | 11.86605 | 0.862325269 | 11.8228   | 1.907464549 | -1.003658186 | 0.986787531 |
| 466033133 | PREDICTED: tropomyosin alpha-4 chain isoform 6 [Orcinus orca]                                                                                                                             | 164.835  | 9.696101021 | 164.4525  | 3.434834724 | -1.0023259   | 0.973819965 |
| 280937    | transforming protein ras - rabbit                                                                                                                                                         | 1.7554   | 0.245396186 | 1.75159   | 0.264678814 | -1.002175167 | 0.992177908 |
| 545857759 | PREDICTED: synaptic vesicle membrane protein VAT-1 homolog [Sus scrofa]                                                                                                                   | 1.4953   | 0.267328035 | 1.49279   | 0.286403496 | -1.001681415 | 0.994846711 |
| 264670244 | nucleophosmin [Bos taurus]                                                                                                                                                                | 1.26038  | 0.257869159 | 1.2586425 | 0.278335495 | -1.001380456 | 0.961912311 |
| 311264072 | PREDICTED: cell surface glycoprotein MUC18 isoform X1 [Sus scrofa]                                                                                                                        | 2.5105   | 0.660855291 | 2.5094    | 0.911915227 | -1.000438352 | 0.998498186 |
| 149702854 | PREDICTED: 60S ribosomal protein L23a-like [Equus caballus]                                                                                                                               | 0.5177   | 0.298900928 | 0.5176    | 0.5176      | -1.000193199 | 0.999825232 |
| 114373    | RecName: Full=Sodium/potassium-transporting ATPase subunit alpha-1; Short=Sodium pump subunit alpha-1; AltName: Full=Na(+)/K(+) ATPase alpha-1 subunit; Flags: Precursor [Equus caballus] | 0.98755  | 0.38462955  | 0         | 0           | 0            | 0.082670109 |
| 545812125 | PREDICTED: alpha-aminoacidic semialdehyde dehydrogenase-like [Sus scrofa]                                                                                                                 | 0.98755  | 0.38462955  | 0         | 0           | 0            | 0.082670109 |
| 157785569 | coatamer subunit alpha [Bos taurus]                                                                                                                                                       | 1.80945  | 0.889706962 | 0         | 0           | 0            | 0.134854524 |
| 560933266 | PREDICTED: PRA1 family protein 3 [Camelus ferus]                                                                                                                                          | 2.4437   | 1.247518516 | 0         | 0           | 0            | 0.145015048 |
| 350594715 | PREDICTED: adipocyte plasma membrane-associated protein [Sus scrofa]                                                                                                                      | 1.68615  | 1.032698938 | 0         | 0           | 0            | 0.201024176 |
| 178056488 | tenascin-X precursor [Sus scrofa]                                                                                                                                                         | 0.729925 | 0.454899845 | 0         | 0           | 0            | 0.206926313 |
| 350582175 | PREDICTED: mitochondrial inner membrane protein, partial [Sus scrofa]                                                                                                                     | 0.765375 | 0.486800411 | 0         | 0           | 0            | 0.213938092 |

|           |                                                                                                    |          |             |   |   |   |             |
|-----------|----------------------------------------------------------------------------------------------------|----------|-------------|---|---|---|-------------|
| 194220950 | PREDICTED: ATP-dependent RNA helicase DDX1 [Equus caballus]                                        | 0.7778   | 0.497606888 | 0 | 0 | 0 | 0.21597607  |
| 126328613 | PREDICTED: non-histone chromosomal protein HMG-17 [Monodelphis domestica]                          | 0.7778   | 0.497606888 | 0 | 0 | 0 | 0.21597607  |
| 350579447 | PREDICTED: protein NipSnap homolog 3A [Sus scrofa]                                                 | 0.769125 | 0.492675365 | 0 | 0 | 0 | 0.21641467  |
| 1236646   | ch4 and secrete domains of swine IgM [Sus scrofa]                                                  | 0.50775  | 0.50775     | 0 | 0 | 0 | 0.391002219 |
| 560926081 | PREDICTED: NADH dehydrogenase [ubiquinone] 1 alpha subcomplex subunit 5 isoform X1 [Camelus ferus] | 0.520175 | 0.520175    | 0 | 0 | 0 | 0.391002219 |
| 149725681 | PREDICTED: ribosome maturation protein SBDS [Equus caballus]                                       | 0.51525  | 0.51525     | 0 | 0 | 0 | 0.391002219 |
| 115496153 | DDRGK domain-containing protein 1 precursor [Bos taurus]                                           | 0.51525  | 0.51525     | 0 | 0 | 0 | 0.391002219 |
| 27807043  | phosphatidylinositol 4-kinase alpha [Bos taurus]                                                   | 0.51525  | 0.51525     | 0 | 0 | 0 | 0.391002219 |
| 667277536 | PREDICTED: keratin, type II cytoskeletal 78 [Galeopterus variegatus]                               | 1.8034   | 1.8034      | 0 | 0 | 0 | 0.391002219 |
| 225382135 | fascin [Sus scrofa]                                                                                | 0.46985  | 0.46985     | 0 | 0 | 0 | 0.391002219 |
| 118151180 | phosphatidate cytidyltransferase 2 [Bos taurus]                                                    | 0.46985  | 0.46985     | 0 | 0 | 0 | 0.391002219 |
| 556736937 | PREDICTED: elongation factor Tu, mitochondrial-like [Pantholops hodgsonii]                         | 0.7048   | 0.7048      | 0 | 0 | 0 | 0.391002219 |
| 519028151 | nitrogen regulatory protein P-II 1 [Methylothera sp. 1P/1]                                         | 0.939725 | 0.939725    | 0 | 0 | 0 | 0.391002219 |
| 335297640 | PREDICTED: 2',3'-cyclic-nucleotide 3'-phosphodiesterase [Sus scrofa]                               | 1.17465  | 1.17465     | 0 | 0 | 0 | 0.391002219 |
| 558701311 | MHC class I antigen [Sus scrofa]                                                                   | 1.409575 | 1.409575    | 0 | 0 | 0 | 0.391002219 |
| 640484928 | MULTISPECIES: molecular chaperone GroEL [Mesorhizobium]                                            | 2.3493   | 2.3493      | 0 | 0 | 0 | 0.391002219 |
